# Supplementary material for: Falls: a marker of preclinical Alzheimer disease: a cohort study protocol
Source: PubMed Central journal article supplement — BMJ Open. 2021 Sep 15;11(9):e050820. doi: 10.1136/bmjopen-2021-050820 (PMC8444237; doi:10.1136/bmjopen-2021-050820), 2021-09-15
Supplement: bmjopen-2021-050820.draft_revisions.pdf [file bmjopen-2021-050820.draft_revisions.pdf]

# BMJ Open

BMJ Open is committed to open peer review. As part of this commitment we make the peer review history of every article we publish publicly available.

When an article is published we post the peer reviewers' comments and the authors' responses online. We also post the versions of the paper that were used during peer review. These are the versions that the peer review comments apply to.

The versions of the paper that follow are the versions that were submitted during the peer review process. They are not the versions of record or the final published versions. They should not be cited or distributed as the published version of this manuscript.

BMJ Open is an open access journal and the full, final, typeset and author-corrected version of record of the manuscript is available on our site with no access controls, subscription charges or pay-per-view fees (<http://bmjopen.bmj.com>).

If you have any questions on BMJ Open's open peer review process please email [info.bmjopen@bmj.com](mailto:info.bmjopen@bmj.com)

# BMJ Open

## Falls: A Marker of Preclinical Alzheimer Disease: A Study Protocol

|                               |                                                                                                                                                                                                                                                                                                                                                                                                                                                                                                                                                                                                                                                                                                                                                                                                                                                                                                                                                                                                                                                                                                                                                                                                                                                                                                                                                                                                                      |
|-------------------------------|----------------------------------------------------------------------------------------------------------------------------------------------------------------------------------------------------------------------------------------------------------------------------------------------------------------------------------------------------------------------------------------------------------------------------------------------------------------------------------------------------------------------------------------------------------------------------------------------------------------------------------------------------------------------------------------------------------------------------------------------------------------------------------------------------------------------------------------------------------------------------------------------------------------------------------------------------------------------------------------------------------------------------------------------------------------------------------------------------------------------------------------------------------------------------------------------------------------------------------------------------------------------------------------------------------------------------------------------------------------------------------------------------------------------|
| Journal:                      | <i>BMJ Open</i>                                                                                                                                                                                                                                                                                                                                                                                                                                                                                                                                                                                                                                                                                                                                                                                                                                                                                                                                                                                                                                                                                                                                                                                                                                                                                                                                                                                                      |
| Manuscript ID                 | bmjopen-2021-050820                                                                                                                                                                                                                                                                                                                                                                                                                                                                                                                                                                                                                                                                                                                                                                                                                                                                                                                                                                                                                                                                                                                                                                                                                                                                                                                                                                                                  |
| Article Type:                 | Protocol                                                                                                                                                                                                                                                                                                                                                                                                                                                                                                                                                                                                                                                                                                                                                                                                                                                                                                                                                                                                                                                                                                                                                                                                                                                                                                                                                                                                             |
| Date Submitted by the Author: | 02-Mar-2021                                                                                                                                                                                                                                                                                                                                                                                                                                                                                                                                                                                                                                                                                                                                                                                                                                                                                                                                                                                                                                                                                                                                                                                                                                                                                                                                                                                                          |
| Complete List of Authors:     | <p>Bollinger, Rebecca; Washington University in St Louis School of Medicine, Program in Occupational Therapy<br/>         Keleman, Audrey; Washington University in St Louis School of Medicine, Program in Occupational Therapy<br/>         Thompson, Regina; Washington University in St Louis School of Medicine, Department of Neurology<br/>         Westerhaus, Elizabeth; Washington University in St Louis School of Medicine, Department of Neurology<br/>         Fagan, Anne; Washington University in St Louis School of Medicine, Department of Neurology<br/>         Benzinger, Tammie; Washington University in St Louis School of Medicine, Department of Radiology<br/>         Schindler, Suzanne; Washington University in St Louis School of Medicine, Department of Neurology<br/>         Xiong, Chengjie; Washington University in St Louis School of Medicine, Division of Biostatistics<br/>         Balota, David; Washington University in St Louis School of Medicine, Department of Neurology, Department of Psychological &amp; Brain Sciences<br/>         Morris, John; Washington University in St Louis School of Medicine, Department of Neurology<br/>         Ances, Beau; Washington University in St Louis School of Medicine, Department of Neurology<br/>         Stark, Susan; Washington University in St Louis School of Medicine, Program in Occupational Therapy</p> |
| Keywords:                     | Dementia < NEUROLOGY, Adult neurology < NEUROLOGY, Neurological injury < NEUROLOGY, NEUROPATHOLOGY, NEUROPHYSIOLOGY                                                                                                                                                                                                                                                                                                                                                                                                                                                                                                                                                                                                                                                                                                                                                                                                                                                                                                                                                                                                                                                                                                                                                                                                                                                                                                  |
|                               |                                                                                                                                                                                                                                                                                                                                                                                                                                                                                                                                                                                                                                                                                                                                                                                                                                                                                                                                                                                                                                                                                                                                                                                                                                                                                                                                                                                                                      |

SCHOLARONE™  
Manuscripts

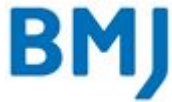

I, the Submitting Author has the right to grant and does grant on behalf of all authors of the Work (as defined in the below author licence), an exclusive licence and/or a non-exclusive licence for contributions from authors who are: i) UK Crown employees; ii) where BMJ has agreed a CC-BY licence shall apply, and/or iii) in accordance with the terms applicable for US Federal Government officers or employees acting as part of their official duties; on a worldwide, perpetual, irrevocable, royalty-free basis to BMJ Publishing Group Ltd ("BMJ") its licensees and where the relevant Journal is co-owned by BMJ to the co-owners of the Journal, to publish the Work in this journal and any other BMJ products and to exploit all rights, as set out in our [licence](#).

The Submitting Author accepts and understands that any supply made under these terms is made by BMJ to the Submitting Author unless you are acting as an employee on behalf of your employer or a postgraduate student of an affiliated institution which is paying any applicable article publishing charge ("APC") for Open Access articles. Where the Submitting Author wishes to make the Work available on an Open Access basis (and intends to pay the relevant APC), the terms of reuse of such Open Access shall be governed by a Creative Commons licence – details of these licences and which [Creative Commons](#) licence will apply to this Work are set out in our licence referred to above.

Other than as permitted in any relevant BMJ Author's Self Archiving Policies, I confirm this Work has not been accepted for publication elsewhere, is not being considered for publication elsewhere and does not duplicate material already published. I confirm all authors consent to publication of this Work and authorise the granting of this licence.

## Falls: A Marker of Preclinical Alzheimer Disease: A Study Protocol

Rebecca M. Bollinger, OTD, OTR/L<sup>1</sup>, Audrey Keleman, MSOT, OTR/L<sup>1</sup>, Regina Thompson, BA<sup>2</sup>, Elizabeth Westerhaus, MA<sup>2</sup>, Anne M. Fagan, PhD<sup>2</sup>, Tammie L.S. Benzinger, MD, PhD<sup>3</sup>, Suzanne E. Schindler, MD, PhD<sup>2</sup>, Chengjie Xiong, PhD<sup>4</sup>, David Balota, PhD<sup>2,5</sup>, John C. Morris, MD<sup>2</sup>, Beau M. Ances, MD, PhD<sup>2</sup>, and Susan L. Stark, PhD, OTR/L<sup>1,2</sup>

<sup>1</sup>Program in Occupational Therapy, Washington University in St. Louis, St. Louis, Missouri, USA

<sup>2</sup>Department of Neurology, Washington University in St. Louis, St. Louis, Missouri, USA

<sup>3</sup>Department of Radiology, Washington University in St. Louis, St. Louis, Missouri, USA

<sup>4</sup>Division of Biostatistics, Washington University in St. Louis, St. Louis, Missouri, USA

<sup>5</sup>Department of Psychological & Brain Sciences, Washington University in St. Louis, St. Louis, Missouri, USA

### Corresponding author:

Susan Stark, PhD, OTR/L, FAOTA  
MSC 8505-66-01  
Washington University School of Medicine  
4444 Forest Park Avenue  
St. Louis, MO 63108  
starks@wusm.wustl.edu  
(314) 273-4114

Manuscript word count: 2883

Abstract word count: 279

Ethical Approval: Washington University in St. Louis Institutional Review Board reference number 201807135.

## Abstract

**Introduction:** Progression to symptomatic Alzheimer disease occurs slowly over a series of preclinical stages. Declining functional mobility may be an early indicator of loss of brain network integration and may lead to an increased risk of experiencing falls. It is unknown whether measures of functional mobility and falls are preclinical markers of Alzheimer disease. The purpose of this study is to examine: (1) the relationship between falls and functional mobility with Alzheimer disease biomarkers to determine when falls occur within the temporal progression to symptomatic Alzheimer disease, and (2) the attentional compared to perceptual/motor systems that underlie falls and functional mobility changes seen with Alzheimer disease.

**Methods and Analysis:** This longitudinal cohort study will be conducted at the Knight Alzheimer Disease Research Center. Approximately 350 cognitively normal participants (with and without preclinical Alzheimer disease) will complete an in-home visit every year for 4 years. During each yearly assessment, functional mobility will be assessed using the Performance Oriented Mobility Assessment, Timed Up and Go, and Timed Up and Go dual task. Data regarding falls (including number and severity) will be collected monthly by self-report and confirmed through interviews. This study will leverage ongoing neuropsychological assessments and neuroimaging (including molecular imaging using positron emission tomography and magnetic resonance imaging) performed by the Knight Alzheimer Disease Research Center. Relationships between falls and biomarkers of amyloid, tau, and neurodegeneration will be evaluated.

**Ethics and Dissemination:** This study was approved by the Washington University in St. Louis Institutional Review Board (reference number 201807135). Written, informed consent will be obtained in the home prior to the collection of any study data. Results will be

1  
2  
3 published in peer-reviewed publications and presented at national and international  
4  
5 conferences.  
6

7 **Keywords:** Neurology - Adult neurology, Neurology - Dementia, Neurology - Neurological  
8  
9 injury, Neuropathology, Neurophysiology  
10  
11

12 **Trial Registration:** ClinicalTrials.gov identifier: N/A  
13  
14

### 15 16 17 **Strengths and Limitations of This Study** 18

- 19 • This study is the first to examine whether changes in falls and functional mobility, in  
20  
21 conjunction with concurrent brain network changes, can predict progression to Alzheimer  
22  
23 disease in older adults.  
24  
25
- 26 • This longitudinal study design will enable us to measure falls and functional mobility  
27  
28 over 4 years with a well-characterised cohort of 350 community-dwelling older adults  
29  
30 who at baseline are cognitively normal (with and without preclinical Alzheimer disease).  
31  
32
- 33 • Participants receive a comprehensive in-home evaluation of their fall risks and  
34  
35 functional mobility, the results of which are shared with each participant.  
36  
37
- 38 • Older adults may not be compliant with fall monitoring over time.  
39
- 40 • It may be difficult to differentiate falling from age-related phenotypes such as frailty.  
41  
42  
43  
44  
45  
46  
47  
48  
49  
50  
51  
52  
53  
54  
55  
56  
57  
58  
59  
60

## INTRODUCTION

Alzheimer disease (AD) is a slowly progressive neurodegenerative disease that affects 60%–70% of the over 50 million people living with dementia worldwide.[1, 2] Progression to symptomatic AD occurs slowly through a series of preclinical stages marked by changes in molecular biomarkers that can be quantified by neuroimaging, cerebrospinal fluid (CSF), or plasma measures.[3] Cognitively normal (CN) Stage 0 individuals have no biomarker abnormalities. CN Stage 1 individuals have only cerebral amyloidosis, CN Stage 2 individuals have amyloidosis and neurodegeneration, and CN Stage 3 individuals have evidence of amyloidosis, neurodegeneration, and subtle cognitive changes.[4-7] These preclinical stages of AD develop over decades and are considered clinically silent.[3] However, emerging evidence suggests that impaired functional mobility (gait and balance) and subsequent falls[8] may precede symptomatic cognitive impairment.[3, 9] Declining functional mobility and increases in falls may be due to subtle changes in attention, executive, motor, and sensory processing and may be an early indicator of loss of integration between the central (CNS) and peripheral (PNS) nervous systems.[8, 10-12]

Falls are a leading cause of injury, long-term disability, premature institutionalisation, and injury-related death in older individuals.[13, 14] Individuals with symptomatic AD have a 60%–80% increased risk of falling, and those who fall are 5 times more likely to be institutionalised than similar individuals who do not fall.[13, 15] A knowledge gap exists as to whether functional mobility and falls could serve as preclinical markers of AD.[16]

We previously demonstrated that falls occur at higher rates during the preclinical phase of AD, and the mechanisms that underlie the deterioration of cognitive function were associated with declines in gait and balance necessary for functional mobility.[9] Functional connections in

1  
2  
3 the brain, referred to as resting state functional connectivity (rs-fc), decrease in symptomatic  
4 AD.[17] We observed a decrease in rs-fc for CN individuals with preclinical AD in the dorsal  
5 attention network (DAN), a set of brain regions involved in attentional control and planning.[17]  
6  
7 Functional connections both within the DAN and across other resting state networks may affect  
8 one's functional mobility when attempting to navigate home and community environments.  
9  
10 While self-reported performance is obtained from CN individuals (with and without preclinical  
11 AD), performance-based measures of everyday function are not recorded. Additional research is  
12 therefore needed to examine the relationship between functional mobility/falls and rs-fc,  
13 especially for CN individuals with preclinical AD.  
14  
15  
16  
17  
18  
19  
20  
21  
22  
23

24 For this longitudinal observational study, we will evaluate CN individuals (with and  
25 without preclinical AD) at baseline who are currently undergoing comprehensive clinical,  
26 neuropsychological, and biomarker evaluations at the Knight Alzheimer Disease Research  
27 Center (Knight ADRC). Annually, we will conduct an in-home evaluation of fall risks and  
28 functional mobility and prospective ascertainment of falls. Comparisons of objective assessments  
29 of functional mobility will be performed with regard to measures of brain pathology (using *in*  
30 *vivo* markers of cerebral amyloidosis and neurodegeneration) to allow us to characterise when  
31 changes in falls and functional mobility occur during the preclinical stages of AD. We will also  
32 examine attentional compared to perceptual/motor systems that underlie falls and functional  
33 mobility in preclinical AD. Falls and functional mobility measures could serve as innovative,  
34 inexpensive screening tools to identify individuals at increased risk for progression to  
35 symptomatic AD. This may have important implications for the timing of interventions in  
36 secondary prevention trials in AD and for the development of more precise, effective treatments  
37 for individuals with AD.[18]  
38  
39  
40  
41  
42  
43  
44  
45  
46  
47  
48  
49  
50  
51  
52  
53  
54  
55  
56  
57  
58  
59  
60



## METHODS AND ANALYSIS

### Participants

In this longitudinal cohort study, community-dwelling older adults will be recruited from an existing cohort followed by the Knight ADRC. Inclusion criteria for this study are:  $\geq 65$  years of age, CN (Clinical Dementia Rating<sup>®</sup> (CDR)[19] score of 0, indicating no dementia), and collection of biomarkers (CSF) and/or neuroimaging (positron emission tomography [PET] and/or magnetic resonance imaging [MRI]) within 2 years of study enrolment. Recruitment procedures for the Knight ADRC have been published previously.[20]

### Recruitment

Participants (N = 350) will be recruited for in-home visits near the time of their annual clinical assessment at the Knight ADRC. Knight ADRC staff will approach participants who meet inclusion criteria about their interest regarding this study. If interested, potential participants will be referred to a study team member who will provide a detailed description of the study procedures and invite the individual to participate. Letters will also be sent to all eligible individuals to invite them to participate in this study. Written, informed consent will be obtained in the home prior to the collection of any study data. This study was approved by the Institutional Review Board at Washington University in St. Louis (reference number: 201807135).

### Study Procedures

All Knight ADRC participants in principle complete longitudinal clinical and neuropsychological assessment and biomarker studies of biofluids (blood, CSF) and

1  
2  
3 neuroimaging (amyloid PET, structural and functional MRI; see grey boxes in Figure 1). For this  
4  
5 study, participants additionally will receive an annual in-home visit and will report falls  
6  
7 prospectively for the duration of the study (see blue boxes in Figure 1).  
8  
9

#### 10 Knight ADRC Clinical Assessment[21]

11  
12  
13  
14 Knight ADRC participants complete an annual clinical assessment battery administered  
15  
16 by an experienced clinician using a standardised protocol. During this visit, the CDR assesses the  
17  
18 participant's cognitive and functional performance: 0 = CN, 0.5 = very mild symptomatic AD, 1  
19  
20 = mild symptomatic AD, 2 = moderate symptomatic AD, or 3 = severe symptomatic AD.[19] A  
21  
22 neurological examination is performed for each participant. At enrolment, participants must have  
23  
24 a CDR = 0.  
25  
26  
27

#### 28 Knight ADRC Psychometric/Neuropsychological Assessments[22]

29  
30  
31  
32 Participants complete a standard 2-hour psychometric battery within 2 weeks of their  
33  
34 annual clinical assessment by an experienced psychometrist and board-certified neurologist  
35  
36 blinded to the participant's preclinical AD status.[22] A sensitive composite of attentional and  
37  
38 executive control tests that is highly predictive of the transition from healthy aging to  
39  
40 symptomatic AD[23-25] will be compared to functional mobility and fall measures.[22]  
41  
42  
43

#### 44 Biomarker Acquisition/Brain Neuropathology Assessments[26]

45  
46  
47 Participants also complete PET scans[27] and MRI[28] and undergo CSF and blood  
48  
49 collection[29, 30] at the Knight ADRC every 3 years.  
50  
51

#### 52 *PET imaging*

53  
54  
55  
56 PET imaging will be conducted on a 3T Siemens Biograph mMR hybrid scanner using  
57  
58  
59

1  
2  
3 the radiotracer [<sup>18</sup>F] Florbetapir (AV45) to detect *in vivo* presence of amyloid in the brain.[27]  
4  
5 Quantitative image analysis will be performed using a standard amyloid imaging analysis  
6  
7 protocol[26] that uses FreeSurfer regions of interest (ROIs; Martinos Center for Biomedical  
8  
9 Imaging, Charlestown, Massachusetts, USA). Regional standardised uptake value ratios  
10  
11 (SUVRs) will be obtained using the cerebellum as the reference region.  
12  
13  
14

### 15 *Structural MRI*

16  
17  
18 High-resolution structural MRI scans will be acquired using a T1-weighted  
19  
20 magnetisation-prepared rapid gradient echo (MPRAGE) sequence to analyse brain volumetrics.  
21  
22 Images will be subsequently analysed using standard procedures developed at the Knight  
23  
24 ADRC using FreeSurfer to delineate brain regions,[31] including cortical and subcortical areas,  
25  
26 typically affected by AD.[28]  
27  
28  
29  
30

### 31 *Functional MRI/network dysfunction*

32  
33  
34 During the MRI scan, rs-fc scans will be obtained using a gradient spin-echo sequence.  
35  
36 Participants will be instructed to fixate on a visual crosshair and not to fall asleep. Rs-fc pre-  
37  
38 and post-processing will be performed using standardised, in-house methods.[32] In preparation  
39  
40 for correlation analysis, data will be spatially smoothed with a 6mm full-width at half  
41  
42 maximum Gaussian blur. Then, temporal low-pass filtering ( $f < 0.1$  Hz) will be applied to the  
43  
44 time series of each voxel. Finally, spurious variance will be removed using linear regression  
45  
46 for: (1) 6 parameters generated from head motion correction, (2) the whole brain signal, and (3)  
47  
48 signals from ventricular and cerebral white matter. An ROI-based analysis consisting of 298  
49  
50 seeds will be performed with a Pearson's correlation coefficient computed between pairwise  
51  
52 ROI time courses across all areas within resting state networks (RSNs). From these 298 seeds,  
53  
54  
55  
56  
57  
58  
59  
60

1  
2  
3 correlation matrices will be generated for each participant. For the 13 RSNs, correlation  
4  
5 coefficients across ROI pairs within a network will be averaged to form a composite score.  
6  
7 Based on average matrices, both intra-network (diagonal) and inter-network (off diagonal)  
8  
9 composite scores will be generated.  
10  
11

### 12 13 *CSF biomarkers*

14  
15  
16 CSF will be collected at approximately 8 a.m. following overnight fasting.[33] Twenty  
17  
18 to thirty millilitres of CSF are collected, centrifuged briefly at low speed, aliquoted into  
19  
20 polypropylene tubes, and then stored at -80°C. A $\beta$ 40, A $\beta$ 42, total tau (tTau), and tau  
21  
22 phosphorylated at 181 (pTau181) are measured by chemiluminescent enzyme immunoassay  
23  
24 using a fully automated platform (LUMIPULSE G1200, Fujirebio[34]) according to the  
25  
26 manufacturer's specifications. *APOE* genotype will be determined by genotyping rs7412 and  
27  
28 rs429358 using Taqman genotyping technology as described previously.[35]  
29  
30  
31

### 32 33 *Preclinical AD staging*

34  
35  
36 Biomarker positivity will be defined by correlating biomarker values at baseline with  
37  
38 the risk of developing AD symptoms over time. The derivation of the biomarker cut-offs will be  
39  
40 independent of the data collected in this project. Of note, CSF markers of tauopathy (pTau181)  
41  
42 and neurodegeneration (tTau) are extremely highly correlated ( $r \sim 0.96$ ), so further stratification  
43  
44 of stage by tauopathy would not be meaningful.[36] Participants will be classified as: CN if  
45  
46 measures of amyloid, neurodegeneration, and episodic memory are normal; Stage 1 if only  
47  
48 measures of amyloid are abnormal by CSF A $\beta$ 42/A $\beta$ 40 or amyloid PET mean cortical SUVRs  
49  
50 (which are highly concordant); Stage 2 if only measures of amyloid and neurodegeneration (by  
51  
52 CSF tTau) are abnormal; and Stage 3 if measures of amyloid, neurodegeneration, and episodic  
53  
54  
55  
56  
57  
58  
59  
60

memory are abnormal.[37]

### Annual In-Home Visit

An occupational therapist (OT), blinded to participants' preclinical AD status, will complete a 120–180-minute in-home visit annually for 4 years. The OT will conduct assessments related to the PNS as well as in-home functional mobility and recognised fall covariates (Tables 1 and 2). Although the annual visit is typically completed in 1 session, it will be completed over 2 sessions if needed due to participant fatigue and/or request. Participants will receive a report with their results from the home visit and fall risk assessment based on established fall risk cut-off scores.[38]

Table 1. Knight ADRC and In-Home Assessments

|                           | Construct                                        | Measure                                                                                                                    | Description                                                                                                                                                              |
|---------------------------|--------------------------------------------------|----------------------------------------------------------------------------------------------------------------------------|--------------------------------------------------------------------------------------------------------------------------------------------------------------------------|
| Central Nervous System    | Attentional/ executive control composite derived | Stroop color naming task[51] <sup>a</sup>                                                                                  | Colour naming of congruent (e.g. red), neutral (e.g. deep), or incongruent (e.g. blue) word.                                                                             |
|                           |                                                  | Simon task[52] <sup>a</sup>                                                                                                | Naming direction of an arrow with a keypress that is spatially consistent or inconsistent with the location of the arrow including congruent and incongruent positioning |
|                           | Attentional switching task[53] <sup>a</sup>      | Switching every other trial between making odd-even decisions and consonant-vowel decisions on bivalent stimuli (e.g. B14) |                                                                                                                                                                          |
| Peripheral Nervous System | Standing, balance, and vestibular function       | Centre of pressure path[54]                                                                                                | Centre of pressure path will be measured using Balance Tracking System (BTrackS)                                                                                         |
|                           | Lower extremity strength and function            | 30-Second chair stand test[55]                                                                                             | A score below the norm will be considered indicative of decreased lower extremity strength and function                                                                  |
|                           |                                                  | Handheld dynamometer[56]                                                                                                   | Minimal change in the peak torque value for lower extremity strength will be measured                                                                                    |
|                           | Grip strength                                    | Handheld dynamometer[57]                                                                                                   | Pounds of force will be captured for grip strength                                                                                                                       |
|                           | Vision                                           | Early Treatment Diabetic Retinopathy Study (ETDRS) test[58]                                                                | Visual acuity score; number of correct letters read                                                                                                                      |
| Sensation                 | Pelli-Robson test[59]                            | Contrast sensitivity; letter-by-letter                                                                                     |                                                                                                                                                                          |
| Functional Mobility       | Dynamic balance and mobility                     | Tuning Fork,[60]                                                                                                           | 8-item questionnaire and sensation testing (vibration (feet) and sharp (arms and legs))                                                                                  |
|                           |                                                  | Sharp                                                                                                                      |                                                                                                                                                                          |
|                           | Gait speed                                       | Performance Oriented Mobility Assessment (POMA)[61]                                                                        | A task-oriented assessment of 9 balance tasks and 7 items to assess gait                                                                                                 |
|                           |                                                  | Timed Up and Go (TUG) test[62]                                                                                             | Timed task of standing up, walking 3m, turning, walking back, and sitting down                                                                                           |

|                        |                        |                                                                                                                                                                                             |                                                                                                             |
|------------------------|------------------------|---------------------------------------------------------------------------------------------------------------------------------------------------------------------------------------------|-------------------------------------------------------------------------------------------------------------|
|                        | Dual-task gait         | Timed Up and Go Cognitive (TUG <sub>cog</sub> )[63]                                                                                                                                         | TUG test while reciting serial 3s with subtractions from various points                                     |
|                        | Dual-task gait         | Timed Up and Go Manual (TUG <sub>man</sub> )[64]                                                                                                                                            | TUG test while carrying a glass of water                                                                    |
| Additional Assessments | Depression             | Patient Health Questionnaire (PHQ-9)[65]                                                                                                                                                    | 10-item questionnaire to assess frequency of symptoms; 0–27 points                                          |
|                        |                        | Geriatric Depression Scale-Short Form (GDS-SF)[66] <sup>a</sup>                                                                                                                             | 15-item questionnaire; 0–15 points                                                                          |
|                        | Functional performance | Performance Assessment of Self-Care Skills (PASS; Rogers & Holm. Performance Assessment of Self-Care Skills. Unpublished performance test. Pittsburgh, PA: University of Pittsburgh, 1989). | Evaluates independence, safety, and adequacy with shopping, chequebook balancing, and medication management |
|                        | Falls behaviour        | Falls Behavioral Scale for Older People (FaB)[67]                                                                                                                                           | 30-item questionnaire; rated from 1 (least protective) to 4 (most protective) behaviours to prevent falls   |
|                        | Olfaction              | University of Pennsylvania Smell Identification Test (UPSIT)[68]                                                                                                                            | 40-item smell identification test; 0–40 points                                                              |
|                        | Hearing                | Hearing Handicap Inventory for the Elderly Screening Version (HHIE-S)[69]                                                                                                                   | 10-item questionnaire to screen for hearing impairment; 0–40 points                                         |
|                        |                        | Brief Hearing Test                                                                                                                                                                          | Screening tone test at varying frequencies                                                                  |

*Note.* <sup>a</sup>Collected at the Knight ADRC.

Table 2. Fall Covariate Composite Score Variables

| Construct            | Measure                                                                             | Description                                                                                                  | Fall risk cut-off[38]     |
|----------------------|-------------------------------------------------------------------------------------|--------------------------------------------------------------------------------------------------------------|---------------------------|
| Vision               | Early Treatment Diabetic Retinopathy Study (ETDRS) test[58]                         | Visual acuity score; number of correct letters read                                                          | ≤12                       |
|                      | Pelli-Robson test[59]                                                               | Contrast sensitivity; letter-by-letter                                                                       | <36 letters               |
| Alcohol abuse        | Short Michigan Alcoholism Screening Test – Geriatric Version (SMAST-G)[70]          | 10-item interview                                                                                            | ≥2                        |
| Urinary incontinence | Frequency and type[71]                                                              | Short questionnaire of frequency and type (stress, urge, or other)                                           | ≥weekly urge incontinence |
| Depression           | Geriatric Depression Scale-Short Form (GDS-SF)[66] <sup>a</sup>                     | 15-item questionnaire; 0–15 points                                                                           | >4                        |
| Pain                 | Self-report[72]                                                                     | Pain scale from 12-item Short Form Survey                                                                    | ≥moderate                 |
| Medication           | Medication review <sup>a</sup>                                                      | Medications and dosages                                                                                      | ≥4 medications            |
| Functional capacity  | Older Adults Resources and Services Activities of Daily Living (OARS ADL) scale[73] | Ability to perform 14 activities; 0–2 scale, higher scores indicate greater independence                     | >4                        |
| Previous falls       | Previous falls[38]                                                                  | Total falls in past 12 months, self-report                                                                   | >0                        |
| Home hazards         | Westmead Home Safety Assessment (WeSHA)[74]                                         | Rates 72 environmental home hazards as hazard/no hazard                                                      | ≥4 hazards                |
| Self-efficacy        | Falls Efficacy Scale – International (FES-ISF)[75]                                  | 7 daily activities; rated from 1 (not at all) to 4 (very concerned) about falling during specific activities | >10                       |

Note. <sup>a</sup>Collected at the Knight ADRC.

### Monthly Fall Reporting

Participants will report falls prospectively via automated call or e-mail every month for 4 years using the gold-standard for fall reporting, including daily calendar journals, fall interviews, and monetary compensation for reporting.[39] Participants will also receive a standardised fall report form to record the time and location of a fall, nature of the fall environment, specific activity at the time of the fall, and any somatic complaints that preceded the fall.[40] If a participant reports a fall, an interviewer blinded to preclinical AD status will call the participant

1  
2  
3 to complete a fall interview to verify the fall, defined as an unintentional movement to the floor,  
4  
5 ground, or an object below knee level. The interviewer will then gather additional information  
6  
7 about any subsequent injuries or medical treatment.[9, 41, 42] The rate (number) and severity  
8  
9 (calculated with a standardised algorithm from medical records and participant report) of falls  
10  
11 will be generated.[13] The falls severity score will be quantified using a previously published  
12  
13 algorithm: no falls (0), 1 fall without serious injury (1), any fall with minor injury or more than 1  
14  
15 fall (2), and major injury requiring hospitalisation (3).[14]  
16  
17  
18  
19

## 20 **Measures**

21  
22  
23 An overview of the assessments collected at the Knight ADRC and annual in-home visits,  
24  
25 including CNS and PNS measures, functional mobility, additional covariates of interest, and fall  
26  
27 covariates, for this study are listed in Tables 1 and 2.  
28  
29  
30

## 31 **Statistical analysis plan**

32  
33  
34 Data will be entered into Research Electronic Data Capture (REDCap),[43] a secure,  
35  
36 web-based application, and analysed using SAS (SAS Institute, Cary, NC, USA). Differences in  
37  
38 baseline characteristics across groups will be compared using appropriate statistics (chi-squared  
39  
40 test, Student t test, or Mann-Whitney U test). Composites and cut-offs will be calculated as  
41  
42 described in the Methods section (see Table 2). Models for analysing AD biomarkers and  
43  
44 cognition will include age, gender, fall risk composite score, APOE status (at least APOE  $\epsilon$ 4  
45  
46 allele), as well as possible interactions among study variables. Models will be implemented using  
47  
48 PROC GLM or PROC MIXED/SAS.  
49  
50  
51

## 52 **Statistical Analysis Plan for the Primary Aim**



1  
2  
3 We will examine the distributions of falls (number and severity) over a 1-year follow-up  
4 window and baseline functional mobility scores across the preclinical stages of AD (0, 1, 2, and  
5 3),[4] with appropriate transformations as needed. Falls severity scores across preclinical stages  
6 will be compared using analysis of covariance models.[44] Similar analyses will be conducted to  
7 compare each of the functional mobility measures across the preclinical stages of AD. We will  
8 implement adequate approaches (e.g. Benjamini-Hochberg false discovery procedure[45]) to  
9 control for the overall type I error rate due to multiple outcome variables (number and severity of  
10 falls, functional mobility) tested in this aim.  
11  
12  
13  
14  
15  
16  
17  
18  
19  
20

21 We will also jointly model the longitudinal falls severity score and the time-to-symptom  
22 onset of AD (defined as the first time a participant receives a CDR > 0) using general linear  
23 mixed effects models.[46] For modelling the risk of developing AD, we will use the  
24 semiparametric Cox proportional hazards model. To address the association between change in  
25 falls and the risk of developing symptomatic AD, we will implement joint models.[47, 48]  
26  
27  
28  
29  
30  
31  
32  
33

#### 34 Statistical Analysis Plan for the Secondary Aim

35  
36  
37 We will test a hypothesised model of attentional compared to perceptual/motor systems  
38 underlying falls in preclinical AD using structural equation models (SEMs) on cross-sectional  
39 data.[49] The structural model will include the estimation of path coefficients among various  
40 latent constructs including brain neuropathology, network dysfunction, PNS abnormalities, and  
41 falls. We will fit and compare various SEMs for their goodness-of-fit through standard statistics  
42 using multiple models.  
43  
44  
45  
46  
47  
48  
49  
50

#### 51 **Sample size calculations**

##### 52 Primary Aim

53  
54  
55  
56  
57  
58  
59  
60

1  
2  
3 To examine the relationship between falls, functional mobility, and AD, we will enrol  
4  
5 350 older adults from the Knight ADRC. Based on the distribution of CN participants across  
6  
7 clinical stages in the existing Knight ADRC database, the proposed sample size will provide at  
8  
9 least 80% statistical power to detect an effect size as small as 0.225 SD on the falls severity score  
10  
11 between 2 adjacent participant groups. From the Knight ADRC database, we fitted a survival  
12  
13 curve from baseline to the time that a CDR > 0 was first rendered. We found an estimated CDR  
14  
15 progression rate of 7.2% per year for individuals with a mean age of 75 at baseline and an  
16  
17 expected attrition of approximately 15%. We estimate that approximately 300 participants will  
18  
19 be assessed annually throughout the study, and approximately 75 of these individuals will  
20  
21 progress to CDR > 0 after baseline. This will provide at least 80% statistical power to detect a 1-  
22  
23 fold increase in the risk of developing symptomatic AD for individuals with an increased rate of  
24  
25 falls over time compared to those with slow or no changes in falls over time. These power  
26  
27 computations were based on a log rank test at the 5% significance level and assumed an annual  
28  
29 rate of 4.7% of CDR progression for individuals with slow changes in disability over time.  
30  
31  
32  
33  
34  
35

### 36 Secondary Aim

37  
38  
39 We also tested non-zero path coefficients that link the latent constructs of network  
40  
41 dysfunction with attentional compared to perceptual/motor systems, and to impaired functional  
42  
43 mobility and falls. The proposed sample provides at least 80% statistical power to detect each  
44  
45 path coefficient.  
46  
47  
48

### 49 **Participants and public involvement**

50  
51  
52 Participants and the public were not involved in the design, conduct, reporting, or  
53  
54 dissemination plans of our research.  
55  
56  
57  
58  
59  
60

## Ethics and dissemination

This study was approved by the Washington University in St. Louis Institutional Review Board (reference number 201807135). Written, informed consent will be obtained in the home prior to the collection of any study data. Participants may withdraw from the study at any time. Results will be published in peer-reviewed publications and presented at national and international conferences.

## DISCUSSION

Changes in functional mobility and an increase in falls may be an early indicator of preclinical AD.[3, 16, 50] Underlying deviations in functional connectivity may assist in identifying brain RSNs that are affected and lead to falls.[17] Measures of everyday function are not currently included in the evaluation of CN individuals with preclinical AD. To examine these relationships, this study will assess the number and severity of falls, functional mobility (gait and balance), and changes in functional connections (rs-fc) within and across RSNs in a sample of community-dwelling older adults. This will allow us to characterise when changes in falls and functional mobility occur during the preclinical stages of AD as well as potential mechanisms.

The strengths of this study include access to a large, well-characterised cohort of community-dwelling older adults at the Knight ADRC who are enthusiastic about participating in studies. Another strength includes a comprehensive in-home evaluation of a participant's fall risks and functional mobility and the ability to share results with each participant.

Although the strengths are promising, there are a few limitations to this study. First, older adults may not be compliant with fall monitoring over time. The OTs will call

1  
2  
3 participants to obtain fall information if participants do not want to complete the fall  
4  
5 monitoring via automated call or e-mail. Last, it may be difficult to differentiate falling from  
6  
7 aging-related phenotypes such as frailty. We will collect information on covariates, including  
8  
9 comorbid conditions and other fall risk factors, test these relationships in individuals without  
10  
11 preclinical AD, and control for these covariates in statistical analyses.  
12  
13

14  
15 This study is designed to examine the relationship between falls and functional  
16  
17 mobility and underlying attentional compared to perceptual/motor systems in preclinical  
18  
19 stages of AD. The findings will enhance our understanding of the systemic manifestations of  
20  
21 AD and may identify falls as a previously unknown risk factor for developing preclinical AD.  
22  
23 If successful, this study can potentially inform the timing of interventions in secondary  
24  
25 prevention trials in AD as well as the development of more precise, effective treatments for  
26  
27 individuals at risk for progression to symptomatic AD.[18]  
28  
29  
30  
31  
32  
33  
34  
35  
36  
37  
38  
39  
40  
41  
42  
43  
44  
45  
46  
47  
48  
49  
50  
51  
52  
53  
54  
55  
56  
57  
58  
59  
60

## Acknowledgements

We would like to thank the Knight Alzheimer Disease Research Center staff and all of our participants for making this study possible.

## Author Contributions

The study concept and design was conceived by SLS, BMA, CX, DB, and JM. Patient safety protocols and IRB compliance will be managed by EW, RT, and RB. Recruitment and data collection will be conducted by RMB, RT, and AK. Analysis will be performed by AMF, TB, SES, and CX. The first draft of the protocol was prepared by BA and SS. All authors provided edits and approved the final version of the protocol.

## Funding

This work was supported by the National Institute on Aging (1 R01 AG057680-01A1), the Healthy Aging and Senile Dementia Program Project (P01 AG03991), the Knight Alzheimer Disease Research Center (P30 AG066444), Antecedent Biomarkers for AD: the Adult Children Study (P01 AG026276), the Paula C. and Rodger O. Riney Fund, and the Daniel J. Brennan MD Fund.

**Role of the Funder/Sponsor:** The funders had no role in the design or conduct of the study; collection, management, analysis, or interpretation of the data; preparation, review, or approval of the manuscript; or decision to submit the manuscript for publication.

## Conflicts of interest

The authors have no conflicts of interest to disclose.

## REFERENCES

1. World Health Organization. Fact sheets: Dementia: World Health Organization; 2020 [updated September 21, 2020; cited 2020]. Available from: <https://www.who.int/en/news-room/fact-sheets/detail/dementia2020>.
2. Patterson C. World Alzheimer Report 2018: the state of the art of dementia research: new frontiers. London: Alzheimer Disease International; 2018.
3. Morris JC, Roe CM, Xiong C, et al. APOE predicts amyloid-beta but not tau Alzheimer pathology in cognitively normal aging. *Ann Neurol* 2010;67(1):122-31. doi: 10.1002/ana.21843
4. Sperling RA, Aisen PS, Beckett LA, et al. Toward defining the preclinical stages of Alzheimer's disease: recommendations from the National Institute on Aging-Alzheimer's Association workgroups on diagnostic guidelines for Alzheimer's disease. *Alzheimers Dement* 2011;7(3):280-92.
5. Bateman RJ, Xiong CJ, Benzinger TLS, et al. Clinical and biomarker changes in dominantly inherited Alzheimer's Disease. *N Engl J Med* 2012;367(9):795-804. doi: 10.1056/NEJMoA1202753
6. Vos SJB, Xiong CJ, Visser PJ, et al. Preclinical Alzheimer's disease and its outcome: a longitudinal cohort study. *Lancet Neurol* 2013;12(10):957-65. doi: 10.1016/S1474-4422(13)70194-7
7. Jack CR, Jr, Bennett DA, Blennow K, et al. A/T/N: an unbiased descriptive classification scheme for Alzheimer disease biomarkers. *Neurology* 2016;87(5):539-47. doi: 10.1212/WNL.0000000000002923
8. Eggenberger P, Wolf M, Schumann M, et al. Exergame and balance training modulate prefrontal brain activity during walking and enhance executive function in older adults. *Front Aging Neurosci* 2016;8:66. doi: 10.3389/fnagi.2016.00066
9. Stark SL, Roe CM, Grant EA, et al. Preclinical Alzheimer disease and risk of falls. *Neurology* 2013;81(5):437-43. Published online first: 2013/06/28. doi: 10.1212/WNL.0b013e31829d8599
10. Montero-Odasso M, Oteng-Amoako A, Speechley M, et al. The motor signature of mild cognitive impairment: results from the gait and brain study. *J Gerontol A Biol Sci Med Sci* 2014 doi: doi:10.1093/gerona/glu155
11. Albers MW, Gilmore GC, Kaye J, et al. At the interface of sensory and motor dysfunctions and Alzheimer's disease. *Alzheimers Dement* 2015;11(1):70-98. doi: 10.1016/j.jalz.2014.04.514
12. Sheridan PL, Hausdorff JM. The role of higher-level cognitive function in gait: executive dysfunction contributes to fall risk in Alzheimer's disease. *Dement Geriatr Cogn Disord* 2007;24(2):125-37.
13. Tinetti ME, Speechley M, Ginter SF. Risk factors for falls among elderly persons living in the community. *N Engl J Med* 1988;319(26):1701-7.
14. Tinetti ME, Williams C. Falls, injuries due to falls, and the risk of admission to a nursing home. *N Engl J Med* 1997;337(18):1279-84.
15. Morris JC, Rubin EH, Morris EJ, et al. Senile dementia of the Alzheimer's type: an important risk factor for serious falls. *J Gerontol* 1987;42(4):412-17.
16. McGough EL, Lin SY, Belza B, et al. A scoping review of physical performance outcome measures used in exercise interventions for older adults with Alzheimer disease and

- related dementias. *J Geriatr Phys Ther* 2019;42(1):28-47. Published online first: 2017/12/07. doi: 10.1519/JPT.0000000000000159
17. Brier MR, Thomas JB, Snyder AZ, et al. Loss of intranetwork and internetwork resting state functional connections with Alzheimer's disease progression. *J Neurosci* 2012;32(26):8890-99.
18. Ansai JH, Andrade LP, Masse FAA, et al. Risk factors for falls in older adults with mild cognitive impairment and mild Alzheimer disease. *J Geriatr Phys Ther* 2019;42(3):E116-E21. Published online first: 2017/08/09. doi: 10.1519/JPT.0000000000000135
19. Morris JC. The Clinical Dementia rating (CDR): current version and scoring rules *Neurology* 1993;43(11):2412-14.
20. Morris JC, Schindler SE, McCue LM, et al. Assessment of racial disparities in biomarkers for Alzheimer disease. *JAMA Neurol* 2019;76(3):264-73. Published online first: 2019/01/08. doi: 10.1001/jamaneurol.2018.4249
21. Berg L, McKeel DW, Jr., Miller JP, et al. Neuropathological indexes of Alzheimer's disease in demented and nondemented persons aged 80 years and older. *Arch Neurol* 1993;50(4):349-58.
22. Storandt M, Hill RD. Very mild senile dementia of the Alzheimer type. II. Psychometric test performance. *Arch Neurol* 1989;46(4):383-6.
23. Duchek JM, Balota DA, Thomas JB, et al. Relationship between Stroop performance and resting state functional connectivity in cognitively normal older adults. *Neuropsychology* 2013;27(5):516.
24. Aschenbrenner AJ, Balota DA, Fagan AM, et al. Alzheimer disease cerebrospinal fluid biomarkers moderate baseline differences and predict longitudinal change in attentional control and episodic memory composites in the adult children study. *J Int Neuropsychol Soc* 2015;21(8):573-83.
25. Aschenbrenner AJ, Balota DA, Tse C-S, et al. Alzheimer disease biomarkers, attentional control, and semantic memory retrieval: synergistic and mediational effects of biomarkers on a sensitive cognitive measure in non-demented older adults. *Neuropsychology* 2015;29(3):368.
26. Su Y, D'Angelo GM, Vlassenko AG, et al. Quantitative analysis of PiB-PET with FreeSurfer ROIs. *PLoS One* 2013;8(11):e73377.
27. Joshi AD, Pontecorvo MJ, Clark CM, et al. Performance characteristics of amyloid PET with florbetapir F 18 in patients with Alzheimer's disease and cognitively normal subjects. *J Nucl Med* 2012;53(3):378-84. doi: 10.2967/jnumed.111.090340
28. Wang L, Benzinger T, Hassenstab J. Spatially distinct atrophy is linked to  $\beta$ -amyloid and tau in preclinical alzheimer disease. *Neurology* 2015;84:1254-60.
29. Carrillo MC, Blackwell A, Hampel H, et al. Early risk assessment for Alzheimer's disease. *Allzheimers Dement* 2009;5:182-96.
30. Craig-Schapiro R, Fagan AM, Holtzman DM. Biomarkers of Alzheimer's disease. *Neurobiol Dis* 2009;35:128-40.
31. Fischl B, Salat DH, Busa E, et al. Whole brain segmentation: automated labeling of neuroanatomical structures in the human brain. *Neuron* 2002;33(3):341-55. doi: 10.1016/s0896-6273(02)00569-x
32. Shulman GL, Pope DL, Astafiev SV, et al. Right hemisphere dominance during spatial selective attention and target detection occurs outside the dorsal frontoparietal network. *J Neurosci* 2010;30(10):3640-51. Published online first: 2010/03/12. doi: 10.1523/JNEUROSCI.4085-09.2010

- 1  
2  
3 33. Fagan AM, Mintun MA, Mach RH, et al. Inverse relation between in vivo amyloid imaging  
4 load and cerebrospinal fluid Abeta42 in humans. *Ann Neurol* 2006;59(3):512-9.  
5 Published online first: 2005/12/24. doi: 10.1002/ana.20730  
6  
7 34. Kaplow J, Vandijck M, Gray J, et al. Concordance of Lumipulse cerebrospinal fluid t-  
8 tau/Abeta42 ratio with amyloid PET status. *Alzheimers Dement* 2020;16(1):144-52.  
9 Published online first: 2020/01/09. doi: 10.1002/alz.12000  
10  
11 35. Cruchaga C, Kauwe JS, Mayo K, et al. SNPs associated with cerebrospinal fluid phospho-tau  
12 levels influence rate of decline in Alzheimer's disease. *PLoS Genet* 2010;6(9):e1001101.  
13 Published online first: 2010/09/24. doi: 10.1371/journal.pgen.1001101  
14  
15 36. Soldan A, Pettigrew C, Fagan AM, et al. ATN profiles among cognitively normal individuals  
16 and longitudinal cognitive outcomes. *Neurology* 2019;92(14):e1567-e79. Published  
17 online first: 2019/03/08. doi: 10.1212/WNL.00000000000007248  
18  
19 37. Mishra S, Gordon BA, Su Y, et al. AV-1451 PET imaging of tau pathology in preclinical  
20 Alzheimer disease: defining a summary measure. *Neuroimage* 2017;161:171-78. doi:  
21 10.1016/j.neuroimage.2017.07.050  
22  
23 38. Lusardi MM, Fritz S, Middleton A, et al. Determining risk of falls in community dwelling  
24 older adults: a systematic review and meta-analysis using posttest probability. *J Geriatr*  
25 *Phys Ther* 2017;40(1):1-36. doi: 10.1519/JPT.0000000000000099  
26  
27 39. Lamb SE, Jørstad-Stein EC, Hauer K, et al. Development of a common outcome data set for  
28 fall injury prevention trials: The prevention of falls network Europe consensus. *J Am*  
29 *Geriatr Soc* 2005;53(9):1618-22.  
30  
31 40. Lach H, Reed A, Arfken C, et al. Falls in the elderly: reliability of a classification system. *J*  
32 *Am Geriatr Soc* 1991;39(2):197-202.  
33  
34 41. Stark SL, Silianoff TJ, Kim HL, et al. Tailored calendar journals to ascertain falls among  
35 older adults. *OTJR (Thorofare N J)* 2015;35(1):53-59.  
36  
37 42. Stark S, Somerville E, Keglovits M, et al. Feasibility trial of tailored home modifications:  
38 process outcomes. *Am J Occup Ther* 2018;72(1):7201205020p1-20p10. doi:  
39 10.5014/ajot.2018.021774  
40  
41 43. Harris PA, Taylor R, Thielke R, et al. Research electronic data capture (REDCap)--a  
42 metadata-driven methodology and workflow process for providing translational research  
43 informatics support. *J Biomed Inform* 2009;42(2):377-81. Published online first:  
44 2008/10/22. doi: 10.1016/j.jbi.2008.08.010  
45  
46 44. Milliken GA, Johnson DE, eds. Analysis of Messy Data. New York: Chapman & Hall/CRC  
47 2001.  
48  
49 45. Benjamini Y, Hochberg Y. Controlling the false discovery rate: A practical and powerful  
50 approach to multiple testing. *J R Stat Soc Series B Stat Methodol* 1995;57(1):289-300.  
51  
52 46. Diggle P, Liang K-Y, Zeger SL. Analysis of Longitudinal Data. New York: Oxford  
53 University Press 1994.  
54  
55 47. Jacqmin-Gadda H, Commenges D, Dartigues JF. Random changepoint model for joint  
56 modeling of cognitive decline and dementia. *Biometrics* 2006;62(1):254-60.  
57  
58 48. De Gruttola V, Tu XM. Modelling progression of CD4-lymphocyte count and its relationship  
59 to survival time. *Biometrics* 1994:1003-14.  
60  
61 49. Kline RB. Principles and Practice of Structural Equation Modeling. Fourth ed. New York:  
The Guilford Press 2015.  
62  
63 50. Stark SL, Roe C, Grant E, et al. Risk of falls in older adults with preclinical Alzheimer's  
disease. Alzheimer's Association International Conference on Alzheimer's Disease. Paris,  
France, 2011.



- 1
- 2
- 3
- 4 51. MacLeod CM. The Stroop task: The “gold standard” of attentional measures. *J Exp Psychol*
- 5 *Gen* 1992;121(1):12-14.
- 6 52. Simon JR. Reactions toward the source of stimulation. *J Exp Psychol* 1969;81(1):174-76.
- 7 doi: 10.1037/h0027448
- 8 53. Schmitter-Edgecombe M, Langill M. Costs of a predictable switch between simple cognitive
- 9 tasks following severe closed-head injury. *Neuropsychology* 2006;20(6):675-84. doi:
- 10 10.1037/0894-4105.20.6.675
- 11 54. O'Connor SM, Baweja HS, Goble DJ. Validating the BTrackS Balance Plate as a low cost
- 12 alternative for the measurement of sway-induced center of pressure. *J Appl Biomech*
- 13 2016;49(16):4142-45. Published online first: 2016/10/30. doi:
- 14 10.1016/j.jbiomech.2016.10.020
- 15 55. Rikli RE, Jones CJ. Functional fitness normative scores for community-residing older adults,
- 16 ages 60-94. *J Aging Phys Act* 1999;7(2):162-81.
- 17 56. O'Shea SD, Taylor NF, Paratz JD. Measuring muscle strength for people with chronic
- 18 obstructive pulmonary disease: retest reliability of hand-held dynamometry. *Arch Phys*
- 19 *Med Rehabil* 2007;88(1):32-6. doi: 10.1016/j.apmr.2006.10.002
- 20 57. Bohannon RW. Hand-grip dynamometry predicts future outcomes in aging adults. *J Geriatr*
- 21 *Phys Ther* 2008;31(1):3-10. Published online first: 2008/05/21. doi: 10.1519/00139143-
- 22 200831010-00002
- 23 58. Ferris FL, Kassoff A, Bresnick G, et al. New visual acuity charts for clinical research. *Am J*
- 24 *Ophthalmol* 1982;94:91-96.
- 25 59. Pelli DG, Robson JG, Wilkins AJ. The design of a new letter chart for measuring contrast
- 26 sensitivity. *Clin Vis Sci* 1988;2(3):187-99.
- 27 60. Kastenbauer T, Sauseng S, Brath H, et al. The value of the Rydel-Seiffer tuning fork as a
- 28 predictor of diabetic polyneuropathy compared with a neurothesiometer. *Diabet Med*
- 29 2004;21(6):563-7. doi: 10.1111/j.1464-5491.2004.01205.x
- 30 61. Tinetti ME. Performance-oriented assessment of mobility problems in elderly patients. *J Am*
- 31 *Geriatr Soc* 1986;34(2):119-26.
- 32 62. Podsiadlo D, Richardson S. The timed "Up & Go": a test of basic functional mobility for frail
- 33 elderly persons. *J Am Geriatr Soc* 1991;39(2):142-48.
- 34 63. Shumway-Cook A, Brauer S, Woollacott M. Predicting the probability for falls in
- 35 community-dwelling older adults using the Timed Up & Go Test. *Phys Ther*
- 36 2000;80(9):896.
- 37 64. Lundin-Olsson L, Nyberg L, Gustafson Y. Attention, frailty, and falls: the effect of a manual
- 38 task on basic mobility. *J Am Geriatr Soc* 1998;46(6):758-61. Published online first:
- 39 1998/06/13. doi: 10.1111/j.1532-5415.1998.tb03813.x
- 40 65. Spitzer RL, Kroenke K, Williams JB. Validation and utility of a self-report version of
- 41 PRIME-MD: the PHQ primary care study. Primary Care Evaluation of Mental Disorders.
- 42 Patient Health Questionnaire. *JAMA* 1999;282(18):1737-44. doi:
- 43 10.1001/jama.282.18.1737
- 44 66. Sheikh J, Yesavage J. Geriatric Depression Scale (GDS): Recent evidence and development
- 45 of a shorter version. *Clin Gerontol* 1986;5:165-73.
- 46 67. Clemson L, Cumming RG, Heard R. The development of an assessment to evaluate
- 47 behavioral factors associated with falling. *Am J Occup Ther* 2003;57(4):380-8. Published
- 48 online first: 2003/08/13. doi: 10.5014/ajot.57.4.380
- 49
- 50
- 51
- 52
- 53
- 54
- 55
- 56
- 57
- 58
- 59
- 60

- 1  
2  
3 68. Doty RL, Shaman P, Kimmelman CP, et al. University of Pennsylvania Smell Identification  
4 Test: a rapid quantitative olfactory function test for the clinic. *Laryngoscope* 1984;94(2  
5 Pt 1):176-8.. doi: 10.1288/00005537-198402000-00004  
6  
7 69. Ventry IM, Weinstein BE. Identification of elderly people with hearing problems. *ASHA*  
8 1983;25(7):37-42.  
9  
10 70. Blow FC, Brower KJ, Schulenberg JE, et al. The Michigan Alcoholism Screening Test –  
11 Geriatric Version (MAST-G): a new elderly-specific screening instrument. *Alcohol Clin*  
12 *Exp Res* 1992;16:372.  
13  
14 71. Brown JS, Vittinghoff E, Wyman JF, et al. Urinary incontinence: does it increase risk for  
15 falls and fractures? *J Am Geriatr Soc* 2000;48(7):721-25. doi: 10.1111/j.1532-  
16 5415.2000.tb04744.x  
17  
18 72. Gandek B, Ware JE, Aaronson NK, et al. Cross-validation of item selection and scoring for  
19 the SF-12 Health Survey in nine countries: results from the IQOLA Project. International  
20 Quality of Life Assessment. *J Clin Epidemiol* 1998;51(11):1171-8.  
21  
22 73. Fillenbaum GG, Smyer MA. The development, validity, and reliability of the OARS  
23 multidimensional functional assessment questionnaire. *J Gerontol* 1981;36(4):428-34..  
24 doi: 10.1093/geronj/36.4.428  
25  
26 74. Clemson L, Roland M, Cumming RG. Types of hazards in the homes of elderly people.  
27 *OTJR (Thorofare N J)* 1997;17(3):200-13.  
28  
29 75. Kempen GI, Yardley L, Van Haastregt JC, et al. The Short FES-I: a shortened version of the  
30 falls efficacy scale-international to assess fear of falling. *Age Ageing* 2008;37(1):45-50.  
31  
32  
33  
34  
35  
36  
37  
38  
39  
40  
41  
42  
43  
44  
45  
46  
47  
48  
49  
50  
51  
52  
53  
54  
55  
56  
57  
58  
59  
60

### Figure Titles and Legends

**Figure 1. Research design overview.** Measures of interest collected by the Knight ADRC will be available at no cost. In-home assessments will be collected annually, and falls will be monitored prospectively.

For peer review only

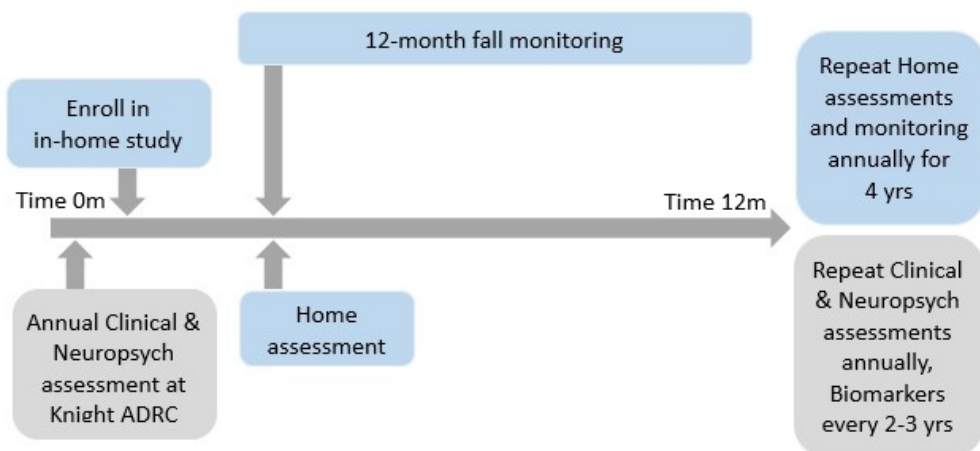

Figure 1. Research design overview. Measures of interest collected by the Knight ADRC will be available at no cost. In-home assessments will be collected annually, and falls will be monitored prospectively.

166x77mm (96 x 96 DPI)

# BMJ Open

## Falls: A Marker of Preclinical Alzheimer Disease: A Cohort Study Protocol

|                                 |                                                                                                                                                                                                                                                                                                                                                                                                                                                                                                                                                                                                                                                                                                                                                                                                                                                                                                                                                                                                                                                                                                                                                                                                                                                                                             |
|---------------------------------|---------------------------------------------------------------------------------------------------------------------------------------------------------------------------------------------------------------------------------------------------------------------------------------------------------------------------------------------------------------------------------------------------------------------------------------------------------------------------------------------------------------------------------------------------------------------------------------------------------------------------------------------------------------------------------------------------------------------------------------------------------------------------------------------------------------------------------------------------------------------------------------------------------------------------------------------------------------------------------------------------------------------------------------------------------------------------------------------------------------------------------------------------------------------------------------------------------------------------------------------------------------------------------------------|
| Journal:                        | <i>BMJ Open</i>                                                                                                                                                                                                                                                                                                                                                                                                                                                                                                                                                                                                                                                                                                                                                                                                                                                                                                                                                                                                                                                                                                                                                                                                                                                                             |
| Manuscript ID                   | bmjopen-2021-050820.R1                                                                                                                                                                                                                                                                                                                                                                                                                                                                                                                                                                                                                                                                                                                                                                                                                                                                                                                                                                                                                                                                                                                                                                                                                                                                      |
| Article Type:                   | Protocol                                                                                                                                                                                                                                                                                                                                                                                                                                                                                                                                                                                                                                                                                                                                                                                                                                                                                                                                                                                                                                                                                                                                                                                                                                                                                    |
| Date Submitted by the Author:   | 18-Aug-2021                                                                                                                                                                                                                                                                                                                                                                                                                                                                                                                                                                                                                                                                                                                                                                                                                                                                                                                                                                                                                                                                                                                                                                                                                                                                                 |
| Complete List of Authors:       | Bollinger, Rebecca; Washington University in St Louis School of Medicine, Program in Occupational Therapy<br>Keleman, Audrey; Washington University in St Louis School of Medicine, Program in Occupational Therapy<br>Thompson, Regina; Washington University in St Louis School of Medicine, Department of Neurology<br>Westerhaus, Elizabeth; Washington University in St Louis School of Medicine, Department of Neurology<br>Fagan, Anne; Washington University in St Louis School of Medicine, Department of Neurology<br>Benzinger, Tammie; Washington University in St Louis School of Medicine, Department of Radiology<br>Schindler, Suzanne; Washington University in St Louis School of Medicine, Department of Neurology<br>Xiong, Chengjie; Washington University in St Louis School of Medicine, Division of Biostatistics<br>Balota, David; Washington University in St Louis School of Medicine, Department of Neurology, Department of Psychological & Brain Sciences<br>Morris, John; Washington University in St Louis School of Medicine, Department of Neurology<br>Ances, Beau; Washington University in St Louis School of Medicine, Department of Neurology<br>Stark, Susan; Washington University in St Louis School of Medicine, Program in Occupational Therapy |
| <b>Primary Subject Heading</b>: | Neurology                                                                                                                                                                                                                                                                                                                                                                                                                                                                                                                                                                                                                                                                                                                                                                                                                                                                                                                                                                                                                                                                                                                                                                                                                                                                                   |
| Secondary Subject Heading:      | Neurology, Geriatric medicine, Public health                                                                                                                                                                                                                                                                                                                                                                                                                                                                                                                                                                                                                                                                                                                                                                                                                                                                                                                                                                                                                                                                                                                                                                                                                                                |
| Keywords:                       | Dementia < NEUROLOGY, Adult neurology < NEUROLOGY, Neurological injury < NEUROLOGY, NEUROPATHOLOGY, NEUROPHYSIOLOGY                                                                                                                                                                                                                                                                                                                                                                                                                                                                                                                                                                                                                                                                                                                                                                                                                                                                                                                                                                                                                                                                                                                                                                         |
|                                 |                                                                                                                                                                                                                                                                                                                                                                                                                                                                                                                                                                                                                                                                                                                                                                                                                                                                                                                                                                                                                                                                                                                                                                                                                                                                                             |

SCHOLARONE™  
Manuscripts



I, the Submitting Author has the right to grant and does grant on behalf of all authors of the Work (as defined in the below author licence), an exclusive licence and/or a non-exclusive licence for contributions from authors who are: i) UK Crown employees; ii) where BMJ has agreed a CC-BY licence shall apply, and/or iii) in accordance with the terms applicable for US Federal Government officers or employees acting as part of their official duties; on a worldwide, perpetual, irrevocable, royalty-free basis to BMJ Publishing Group Ltd ("BMJ") its licensees and where the relevant Journal is co-owned by BMJ to the co-owners of the Journal, to publish the Work in this journal and any other BMJ products and to exploit all rights, as set out in our [licence](#).

The Submitting Author accepts and understands that any supply made under these terms is made by BMJ to the Submitting Author unless you are acting as an employee on behalf of your employer or a postgraduate student of an affiliated institution which is paying any applicable article publishing charge ("APC") for Open Access articles. Where the Submitting Author wishes to make the Work available on an Open Access basis (and intends to pay the relevant APC), the terms of reuse of such Open Access shall be governed by a Creative Commons licence – details of these licences and which [Creative Commons](#) licence will apply to this Work are set out in our licence referred to above.

Other than as permitted in any relevant BMJ Author's Self Archiving Policies, I confirm this Work has not been accepted for publication elsewhere, is not being considered for publication elsewhere and does not duplicate material already published. I confirm all authors consent to publication of this Work and authorise the granting of this licence.

## Falls: A Marker of Preclinical Alzheimer Disease: A Cohort Study Protocol

Rebecca M. Bollinger, OTD, OTR/L<sup>1</sup>, Audrey Keleman, MSOT, OTR/L<sup>1</sup>, Regina Thompson, BA<sup>2</sup>, Elizabeth Westerhaus, MA<sup>2</sup>, Anne M. Fagan, PhD<sup>2</sup>, Tammie L.S. Benzinger, MD, PhD<sup>3</sup>, Suzanne E. Schindler, MD, PhD<sup>2</sup>, Chengjie Xiong, PhD<sup>4</sup>, David Balota, PhD<sup>2,5</sup>, John C. Morris, MD<sup>2</sup>, Beau M. Ances, MD, PhD<sup>2</sup>, and Susan L. Stark, PhD, OTR/L<sup>1,2</sup>

<sup>1</sup>Program in Occupational Therapy, Washington University in St. Louis, St. Louis, Missouri, USA

<sup>2</sup>Department of Neurology, Washington University in St. Louis, St. Louis, Missouri, USA

<sup>3</sup>Department of Radiology, Washington University in St. Louis, St. Louis, Missouri, USA

<sup>4</sup>Division of Biostatistics, Washington University in St. Louis, St. Louis, Missouri, USA

<sup>5</sup>Department of Psychological & Brain Sciences, Washington University in St. Louis, St. Louis, Missouri, USA

### Corresponding author:

Susan Stark, PhD, OTR/L, FAOTA  
MSC 8505-66-01  
Washington University School of Medicine  
4444 Forest Park Avenue  
St. Louis, MO 63108  
starks@wusm.wustl.edu  
(314) 273-4114

Manuscript word count: 2883

Abstract word count: 279

Ethical Approval: Washington University in St. Louis Institutional Review Board reference number 201807135.

## Abstract

**Introduction:** Progression to symptomatic Alzheimer disease occurs slowly over a series of preclinical stages. Declining functional mobility may be an early indicator of loss of brain network integration and may lead to an increased risk of experiencing falls. It is unknown whether measures of functional mobility and falls are preclinical markers of Alzheimer disease. The purpose of this study is to examine: (1) the relationship between falls and functional mobility with Alzheimer disease biomarkers to determine when falls occur within the temporal progression to symptomatic Alzheimer disease, and (2) the attentional compared to perceptual/motor systems that underlie falls and functional mobility changes seen with Alzheimer disease.

**Methods and Analysis:** This longitudinal cohort study will be conducted at the Knight Alzheimer Disease Research Center. Approximately 350 cognitively normal participants (with and without preclinical Alzheimer disease) will complete an in-home visit every year for 4 years. During each yearly assessment, functional mobility will be assessed using the Performance Oriented Mobility Assessment, Timed Up and Go, and Timed Up and Go dual task. Data regarding falls (including number and severity) will be collected monthly by self-report and confirmed through interviews. This study will leverage ongoing neuropsychological assessments and neuroimaging (including molecular imaging using positron emission tomography and magnetic resonance imaging) performed by the Knight Alzheimer Disease Research Center. Relationships between falls and biomarkers of amyloid, tau, and neurodegeneration will be evaluated.

**Ethics and Dissemination:** This study was approved by the Washington University in St. Louis Institutional Review Board (reference number 201807135). Written, informed consent will be obtained in the home prior to the collection of any study data. Results will be



1  
2  
3 published in peer-reviewed publications and presented at national and international  
4  
5 conferences.  
6

7 **Keywords:** Neurology - Adult neurology, Neurology - Dementia, Neurology - Neurological  
8  
9 injury, Neuropathology, Neurophysiology  
10  
11

12 **Trial Registration:** ClinicalTrials.gov identifier: N/A  
13  
14

### 15 16 17 **Strengths and Limitations of This Study** 18

- 19 • This study is the first to examine whether changes in falls and functional mobility, in  
20 conjunction with concurrent brain network changes, can predict progression to Alzheimer  
21 disease in older adults.  
22  
23
- 24 • This longitudinal study design will enable us to measure falls and functional mobility  
25 over 4 years with a well-characterised cohort of 350 community-dwelling older adults  
26 who at baseline are cognitively normal (with and without preclinical Alzheimer disease).  
27  
28
- 29 • Participants receive a comprehensive in-home evaluation of their fall risks and  
30 functional mobility, the results of which are shared with each participant.  
31  
32
- 33 • Older adults may not be compliant with fall monitoring over time.  
34  
35
- 36 • It may be difficult to differentiate falling from age-related phenotypes such as frailty.  
37  
38  
39  
40  
41  
42  
43  
44  
45  
46  
47  
48  
49  
50  
51  
52  
53  
54  
55  
56  
57  
58  
59  
60

## INTRODUCTION

Alzheimer disease (AD) is a slowly progressive neurodegenerative disease that affects 60%–70% of the over 50 million people living with dementia worldwide.[1, 2] Progression to symptomatic AD occurs slowly through a series of preclinical stages marked by changes in molecular biomarkers that can be quantified by neuroimaging, cerebrospinal fluid (CSF), or plasma measures.[3] Cognitively normal (CN) Stage 0 individuals have no biomarker abnormalities. CN Stage 1 individuals have only cerebral amyloidosis, CN Stage 2 individuals have amyloidosis and neurodegeneration, and CN Stage 3 individuals have evidence of amyloidosis, neurodegeneration, and subtle cognitive changes.[4-7] These preclinical stages of AD develop over decades and are considered clinically silent.[3] However, emerging evidence suggests that impaired functional mobility (gait and balance) and subsequent falls[8] may precede symptomatic cognitive impairment.[3, 9] Declining functional mobility and increases in falls may be due to subtle changes in attention, executive, motor, and sensory processing and may be an early indicator of loss of integration between the central (CNS) and peripheral (PNS) nervous systems.[8, 10-12]

Falls are a leading cause of injury, long-term disability, premature institutionalisation, and injury-related death in older individuals.[13, 14] Individuals with symptomatic AD have a 60%–80% increased risk of falling, and those who fall are 5 times more likely to be institutionalised than similar individuals who do not fall.[13, 15] A knowledge gap exists as to whether functional mobility and falls could serve as preclinical markers of AD.[16]

We previously demonstrated that falls occur at higher rates during the preclinical phase of AD, and the mechanisms that underlie the deterioration of cognitive function were associated with declines in gait and balance necessary for functional mobility.[9] Functional connections in

1  
2  
3 the brain, referred to as resting state functional connectivity (rs-fc), decrease in symptomatic  
4 AD.[17] We observed a decrease in rs-fc for CN individuals with preclinical AD in the dorsal  
5 attention network (DAN), a set of brain regions involved in attentional control and planning.[17]  
6  
7 Functional connections both within the DAN and across other resting state networks may affect  
8 one's functional mobility when attempting to navigate home and community environments.  
9  
10 While self-reported performance is obtained from CN individuals (with and without preclinical  
11 AD), performance-based measures of everyday function are not recorded. Additional research is  
12 therefore needed to examine the relationship between functional mobility/falls and rs-fc,  
13 especially for CN individuals with preclinical AD.  
14  
15  
16  
17  
18  
19  
20  
21  
22  
23

24 For this longitudinal observational study, we will evaluate CN individuals (with and  
25 without preclinical AD) at baseline who are currently undergoing comprehensive clinical,  
26 neuropsychological, and biomarker evaluations at the Knight Alzheimer Disease Research  
27 Center (Knight ADRC). Annually, we will conduct an in-home evaluation of fall risks and  
28 functional mobility and prospective ascertainment of falls. Comparisons of objective assessments  
29 of functional mobility will be performed with regard to measures of brain pathology (using *in*  
30 *vivo* markers of cerebral amyloidosis and neurodegeneration) to allow us to characterise when  
31 changes in falls and functional mobility occur during the preclinical stages of AD. We will also  
32 examine attentional compared to perceptual/motor systems that underlie falls and functional  
33 mobility in preclinical AD. Falls and functional mobility measures could serve as innovative,  
34 inexpensive screening tools to identify individuals at increased risk for progression to  
35 symptomatic AD. This may have important implications for the timing of interventions in  
36 secondary prevention trials in AD and for the development of more precise, effective treatments  
37 for individuals with AD.[18]  
38  
39  
40  
41  
42  
43  
44  
45  
46  
47  
48  
49  
50  
51  
52  
53  
54  
55  
56  
57  
58  
59  
60

## METHODS AND ANALYSIS

### Participants

In this longitudinal cohort study, community-dwelling older adults will be recruited from an existing cohort followed by the Knight ADRC. Inclusion criteria for this study are:  $\geq 65$  years of age, CN (Clinical Dementia Rating<sup>®</sup> (CDR)[19] score of 0, indicating no dementia), and collection of biomarkers (CSF) and/or neuroimaging (positron emission tomography [PET] and/or magnetic resonance imaging [MRI]) within 2 years of study enrolment. Recruitment procedures for the Knight ADRC have been published previously.[20]

### Recruitment

Participants (N = 350) will be recruited for in-home visits near the time of their annual clinical assessment at the Knight ADRC. Knight ADRC staff will approach participants who meet inclusion criteria about their interest regarding this study. If interested, potential participants will be referred to a study team member who will provide a detailed description of the study procedures and invite the individual to participate. Letters will also be sent to all eligible individuals to invite them to participate in this study. Written, informed consent will be obtained in the home prior to the collection of any study data. This study was approved by the Institutional Review Board at Washington University in St. Louis (reference number: 201807135).

### Study Procedures

All Knight ADRC participants in principle complete longitudinal clinical and neuropsychological assessment and biomarker studies of biofluids (blood, CSF) and

1  
2  
3 neuroimaging (amyloid PET, structural and functional MRI; see grey boxes in Figure 1). For this  
4  
5 study, participants additionally will receive an annual in-home visit and will report falls  
6  
7 prospectively for the duration of the study (see blue boxes in Figure 1).  
8  
9

#### 10 Knight ADRC Clinical Assessment[21]

11  
12  
13  
14 Knight ADRC participants complete an annual clinical assessment battery administered  
15  
16 by an experienced clinician using a standardised protocol. During this visit, the CDR assesses the  
17  
18 participant's cognitive and functional performance: 0 = CN, 0.5 = very mild symptomatic AD, 1  
19  
20 = mild symptomatic AD, 2 = moderate symptomatic AD, or 3 = severe symptomatic AD.[19] A  
21  
22 neurological examination is performed for each participant. At enrolment, participants must have  
23  
24 a CDR = 0.  
25  
26  
27

#### 28 Knight ADRC Psychometric/Neuropsychological Assessments[22]

29  
30  
31  
32 Participants complete a standard 2-hour psychometric battery within 2 weeks of their  
33  
34 annual clinical assessment by an experienced psychometrist and board-certified neurologist  
35  
36 blinded to the participant's preclinical AD status.[22] A sensitive composite of attentional and  
37  
38 executive control tests that is highly predictive of the transition from healthy aging to  
39  
40 symptomatic AD[23-25] will be compared to functional mobility and fall measures.[22]  
41  
42  
43

#### 44 Biomarker Acquisition/Brain Neuropathology Assessments[26]

45  
46  
47 Participants also complete PET scans[27] and MRI[28] and undergo CSF and blood  
48  
49 collection[29, 30] at the Knight ADRC every 3 years.  
50  
51

#### 52 *PET imaging*

53  
54  
55  
56 PET imaging will be conducted on a 3T Siemens Biograph mMR hybrid scanner using  
57  
58  
59

1  
2  
3 the radiotracer [<sup>18</sup>F] Florbetapir (AV45) to detect *in vivo* presence of amyloid in the brain.[27]  
4  
5 Quantitative image analysis will be performed using a standard amyloid imaging analysis  
6  
7 protocol[26] that uses FreeSurfer regions of interest (ROIs; Martinos Center for Biomedical  
8  
9 Imaging, Charlestown, Massachusetts, USA). Regional standardised uptake value ratios  
10  
11 (SUVRs) will be obtained using the cerebellum as the reference region.  
12  
13  
14

### 15 *Structural MRI*

16  
17  
18 High-resolution structural MRI scans will be acquired using a T1-weighted  
19  
20 magnetisation-prepared rapid gradient echo (MPRAGE) sequence to analyse brain volumetrics.  
21  
22 Images will be subsequently analysed using standard procedures developed at the Knight  
23  
24 ADRC using FreeSurfer to delineate brain regions,[31] including cortical and subcortical areas,  
25  
26 typically affected by AD.[28]  
27  
28  
29  
30

### 31 *Functional MRI/network dysfunction*

32  
33  
34 During the MRI scan, rs-fc scans will be obtained using a gradient spin-echo sequence.  
35  
36 Participants will be instructed to fixate on a visual crosshair and not to fall asleep. Rs-fc pre-  
37  
38 and post-processing will be performed using standardised, in-house methods.[32] In preparation  
39  
40 for correlation analysis, data will be spatially smoothed with a 6mm full-width at half  
41  
42 maximum Gaussian blur. Then, temporal low-pass filtering ( $f < 0.1$  Hz) will be applied to the  
43  
44 time series of each voxel. Finally, spurious variance will be removed using linear regression  
45  
46 for: (1) 6 parameters generated from head motion correction, (2) the whole brain signal, and (3)  
47  
48 signals from ventricular and cerebral white matter. An ROI-based analysis consisting of 298  
49  
50 seeds will be performed with a Pearson's correlation coefficient computed between pairwise  
51  
52 ROI time courses across all areas within resting state networks (RSNs). From these 298 seeds,  
53  
54  
55  
56  
57  
58  
59  
60

1  
2  
3 correlation matrices will be generated for each participant. For the 13 RSNs, correlation  
4  
5 coefficients across ROI pairs within a network will be averaged to form a composite score.  
6  
7 Based on average matrices, both intra-network (diagonal) and inter-network (off diagonal)  
8  
9 composite scores will be generated.  
10  
11

### 12 13 *CSF biomarkers*

14  
15  
16 CSF will be collected at approximately 8 a.m. following overnight fasting.[33] Twenty  
17  
18 to thirty millilitres of CSF are collected, centrifuged briefly at low speed, aliquoted into  
19  
20 polypropylene tubes, and then stored at -80°C. A $\beta$ 40, A $\beta$ 42, total tau (tTau), and tau  
21  
22 phosphorylated at 181 (pTau181) are measured by chemiluminescent enzyme immunoassay  
23  
24 using a fully automated platform (LUMIPULSE G1200, Fujirebio)[34] according to the  
25  
26 manufacturer's specifications. *APOE* genotype will be determined by genotyping rs7412 and  
27  
28 rs429358 using Taqman genotyping technology as described previously.[35]  
29  
30  
31

### 32 33 *Preclinical AD staging*

34  
35  
36 Biomarker positivity will be defined by correlating biomarker values at baseline with  
37  
38 the risk of developing AD symptoms over time. The derivation of the biomarker cut-offs will be  
39  
40 independent of the data collected in this project. Of note, CSF markers of tauopathy (pTau181)  
41  
42 and neurodegeneration (tTau) are extremely highly correlated ( $r \sim 0.96$ ), so further stratification  
43  
44 of stage by tauopathy would not be meaningful.[36] Participants will be classified as: CN if  
45  
46 measures of amyloid, neurodegeneration, and episodic memory are normal; Stage 1 if only  
47  
48 measures of amyloid are abnormal by CSF A $\beta$ 42/A $\beta$ 40 or amyloid PET mean cortical SUVRs  
49  
50 (which are highly concordant); Stage 2 if only measures of amyloid and neurodegeneration (by  
51  
52 CSF tTau) are abnormal; and Stage 3 if measures of amyloid, neurodegeneration, and episodic  
53  
54  
55  
56  
57  
58  
59  
60

memory are abnormal.[37]

## Annual In-Home Visit

An occupational therapist (OT), blinded to participants' preclinical AD status, will complete a 120–180-minute in-home visit annually for 4 years. The OT will conduct assessments related to the PNS as well as in-home functional mobility and recognised fall covariates (Tables 1 and 2). Although the annual visit is typically completed in 1 session, it will be completed over 2 sessions if needed due to participant fatigue and/or request. Participants will receive a report with their results from the home visit and fall risk assessment based on established fall risk cut-off scores.[38]

Table 1. Knight ADRC and In-Home Assessments

|                           | Construct                                        | Measure                                                                                 | Description                                                                                                                                                              |
|---------------------------|--------------------------------------------------|-----------------------------------------------------------------------------------------|--------------------------------------------------------------------------------------------------------------------------------------------------------------------------|
| Central Nervous System    | Attentional/ executive control composite derived | Stroop color naming task[39] <sup>a</sup>                                               | Colour naming of congruent (e.g. red), neutral (e.g. deep), or incongruent (e.g. blue) word.                                                                             |
|                           |                                                  | Simon task[40] <sup>a</sup>                                                             | Naming direction of an arrow with a keypress that is spatially consistent or inconsistent with the location of the arrow including congruent and incongruent positioning |
|                           |                                                  | Attentional switching task[41] <sup>a</sup>                                             | Switching every other trial between making odd-even decisions and consonant-vowel decisions on bivalent stimuli (e.g. B14)                                               |
| Peripheral Nervous System | Standing, balance, and vestibular function       | Centre of pressure path[42]                                                             | Centre of pressure path will be measured using Balance Tracking System (BTrackS)                                                                                         |
|                           | Lower extremity strength and function            | 30-Second chair stand test[43]                                                          | A score below the norm will be considered indicative of decreased lower extremity strength and function                                                                  |
|                           |                                                  | Handheld dynamometer[44]                                                                | Minimal change in the peak torque value for lower extremity strength will be measured                                                                                    |
|                           | Grip strength                                    | Handheld dynamometer[45]                                                                | Pounds of force will be captured for grip strength                                                                                                                       |
|                           | Vision                                           | Early Treatment Diabetic Retinopathy Study (ETDRS) test[46]<br>Pelli-Robson test[47]    | Visual acuity score; number of correct letters read<br>Contrast sensitivity; letter-by-letter                                                                            |
| Sensation                 | Tuning Fork, Sharp[48]                           | 8-item questionnaire and sensation testing (vibration (feet) and sharp (arms and legs)) |                                                                                                                                                                          |
| Functional Mobility       | Dynamic balance and mobility                     | Performance Oriented Mobility Assessment (POMA)[49]                                     | A task-oriented assessment of 9 balance tasks and 7 items to assess gait                                                                                                 |
|                           | Gait speed                                       | Timed Up and Go (TUG) test[50]                                                          | Timed task of standing up, walking 3m, turning, walking back, and sitting down                                                                                           |
|                           | Dual-task gait                                   | Timed Up and Go Cognitive (TUG <sub>cog</sub> )[51]                                     | TUG test while reciting serial 3s with subtractions from various points                                                                                                  |



Table 2. Fall Covariate Composite Score Variables

| Construct              | Measure                                                                             | Description                                                                                                  | Fall risk cut-off[38]                    |
|------------------------|-------------------------------------------------------------------------------------|--------------------------------------------------------------------------------------------------------------|------------------------------------------|
| Vision                 | Early Treatment Diabetic Retinopathy Study (ETDRS) test[46]                         | Visual acuity score; number of correct letters read                                                          | ≤12                                      |
|                        | Pelli-Robson test[47]                                                               | Contrast sensitivity; letter-by-letter                                                                       | <36 letters                              |
| Alcohol abuse          | Short Michigan Alcoholism Screening Test – Geriatric Version (SMAST-G)[53]          | 10-item interview                                                                                            | ≥2                                       |
| Depression             | Geriatric Depression Scale-Short Form (GDS-SF)[55] <sup>a</sup>                     | 15-item questionnaire; 0–15 points                                                                           | >4                                       |
| Urinary incontinence   | Frequency and type[56]                                                              | Short questionnaire of frequency and type (stress, urge, or other)                                           | ≥weekly urge incontinence                |
| Pain                   | Self-report[57]                                                                     | Pain scale from 12-item Short Form Survey                                                                    | ≥moderate                                |
| Medication             | Medication review <sup>a</sup>                                                      | Medications and dosages                                                                                      | ≥4 medications                           |
| Functional capacity    | Older Adults Resources and Services Activities of Daily Living (OARS)               | Ability to perform 14 activities; 0–2 scale, higher scores indicate greater                                  | >4                                       |
|                        | Dual-task gait                                                                      | Timed Up and Go Manual (TUG <sub>man</sub> )[52]                                                             | TUG test while carrying a glass of water |
| Alcohol abuse          | Short Michigan Alcoholism Screening Test – Geriatric Version (SMAST-G)[53]          | 10-item interview                                                                                            |                                          |
| Depression             | Patient Health Questionnaire (PHQ-9)[54]                                            | 10-item questionnaire to assess frequency of symptoms; 0–27 points                                           |                                          |
|                        | Geriatric Depression Scale-Short Form (GDS-SF)[55] <sup>a</sup>                     | 15-item questionnaire; 0–15 points                                                                           |                                          |
| Urinary incontinence   | Frequency and type[56]                                                              | Short questionnaire of frequency and type (stress, urge, or other)                                           |                                          |
| Pain                   | Self-report[57]                                                                     | Pain scale from 12-item Short Form Survey                                                                    |                                          |
| Medication             | Medication review <sup>a</sup>                                                      | Medications and dosages                                                                                      |                                          |
| Functional capacity    | Older Adults Resources and Services Activities of Daily Living (OARS ADL) scale[58] | Ability to perform 14 activities; 0–2 scale, higher scores indicate greater independence                     |                                          |
| Functional performance | Performance Assessment of Self-Care Skills (PASS)[59]                               | Evaluates independence, safety, and adequacy with shopping, chequebook balancing, and medication management  |                                          |
| Falls behaviour        | Falls Behavioral Scale for Older People (FaB)[60]                                   | 30-item questionnaire; rated from 1 (least protective) to 4 (most protective) behaviours to prevent falls    |                                          |
| Self-efficacy          | Falls Efficacy Scale – International (FES-ISF)[61]                                  | 7 daily activities; rated from 1 (not at all) to 4 (very concerned) about falling during specific activities |                                          |
| Home hazards           | Westmead Home Safety Assessment (WeSHA)[62]                                         | Rates 72 environmental home hazards as hazard/no hazard                                                      |                                          |
| Olfaction              | University of Pennsylvania Smell Identification Test (UPSIT)[63]                    | 40-item smell identification test; 0–40 points                                                               |                                          |
| Hearing                | Hearing Handicap Inventory for the Elderly Screening Version (HHIE-S)[64]           | 10-item questionnaire to screen for hearing impairment; 0–40 points                                          |                                          |
|                        | Brief Hearing Test                                                                  | Screening tone test at varying frequencies                                                                   |                                          |

Note. <sup>a</sup>Collected at the Knight ADRC.

|                |                                                    |                                                                                                              |            |
|----------------|----------------------------------------------------|--------------------------------------------------------------------------------------------------------------|------------|
|                | ADL) scale[58]                                     | independence                                                                                                 |            |
| Previous falls | Previous falls[38]                                 | Total falls in past 12 months, self-report                                                                   | >0         |
| Home hazards   | Westmead Home Safety Assessment (WeSHA)[62]        | Rates 72 environmental home hazards as hazard/no hazard                                                      | ≥4 hazards |
| Self-efficacy  | Falls Efficacy Scale – International (FES-ISF)[61] | 7 daily activities; rated from 1 (not at all) to 4 (very concerned) about falling during specific activities | >10        |

*Note.* <sup>a</sup>Collected at the Knight ADRC.

## Monthly Fall Reporting

Participants will report falls prospectively via automated call or e-mail every month for 4 years using the gold-standard for fall reporting, including daily calendar journals, fall interviews, and monetary compensation for reporting.[65] Participants will also receive a standardised fall report form to record the time and location of a fall, nature of the fall environment, specific activity at the time of the fall, and any somatic complaints that preceded the fall.[66] If a participant reports a fall, an interviewer blinded to preclinical AD status will call the participant to complete a fall interview to verify the fall, defined as an unintentional movement to the floor, ground, or an object below knee level. The interviewer will then gather additional information about any subsequent injuries or medical treatment.[9, 67, 68] The rate (number) and severity (calculated with a standardised algorithm from medical records and participant report) of falls will be generated.[13] The falls severity score will be quantified using a previously published algorithm: no falls (0), 1 fall without serious injury (1), any fall with minor injury or more than 1 fall (2), and major injury requiring hospitalisation (3).[14]

## Measures

An overview of the assessments collected at the Knight ADRC and annual in-home visits, including CNS and PNS measures, functional mobility, additional covariates of interest, and fall covariates, for this study are listed in Tables 1 and 2.

## Statistical analysis plan

Data will be entered into Research Electronic Data Capture (REDCap),[69] a secure, web-based application, and analysed using SAS (SAS Institute, Cary, NC, USA). Differences in baseline characteristics across groups will be compared using appropriate statistics (chi-squared test, Student t test, or Mann-Whitney U test). Composites and cut-offs will be calculated as described in the Methods section (see Table 2). Models for analysing AD biomarkers and cognition will include age, gender, fall risk composite score, APOE status (at least APOE ε4 allele), as well as possible interactions among study variables. Models will be implemented using PROC GLM or PROC MIXED/SAS.

### Statistical Analysis Plan for the Primary Aim

We will examine the distributions of falls (number and severity) over a 1-year follow-up window and baseline functional mobility scores across the preclinical stages of AD (0, 1, 2, and 3),[4] with appropriate transformations as needed. Falls severity scores across preclinical stages will be compared using analysis of covariance models.[70] Similar analyses will be conducted to compare each of the functional mobility measures across the preclinical stages of AD. We will implement adequate approaches (e.g. Benjamini-Hochberg false discovery procedure)[71] to control for the overall type I error rate due to multiple outcome variables (number and severity of falls, functional mobility) tested in this aim.

We will also jointly model the longitudinal falls severity score and the time-to-symptom onset of AD (defined as the first time a participant receives a CDR > 0) using general linear mixed effects models.[72] For modelling the risk of developing AD, we will use the semiparametric Cox proportional hazards model. To address the association between change in falls and the risk of developing symptomatic AD, we will implement joint models.[73, 74]

## Statistical Analysis Plan for the Secondary Aim

We will test a hypothesised model of attentional compared to perceptual/motor systems underlying falls in preclinical AD using structural equation models (SEMs) on cross-sectional data.[75] The structural model will include the estimation of path coefficients among various latent constructs including brain neuropathology, network dysfunction, PNS abnormalities, and falls. We will fit and compare various SEMs for their goodness-of-fit through standard statistics using multiple models.

### **Sample size calculations**

#### Primary Aim

To examine the relationship between falls, functional mobility, and AD, we will enrol 350 older adults from the Knight ADRC. Based on the distribution of CN participants across clinical stages in the existing Knight ADRC database, the proposed sample size will provide at least 80% statistical power to detect an effect size as small as 0.225 SD on the falls severity score between 2 adjacent participant groups. From the Knight ADRC database, we fitted a survival curve from baseline to the time that a CDR > 0 was first rendered. We found an estimated CDR progression rate of 7.2% per year for individuals with a mean age of 75 at baseline and an expected attrition of approximately 15%. We estimate that approximately 300 participants will be assessed annually throughout the study, and approximately 75 of these individuals will progress to CDR > 0 after baseline. This will provide at least 80% statistical power to detect a 1-fold increase in the risk of developing symptomatic AD for individuals with an increased rate of falls over time compared to those with slow or no changes in falls over time. These power

1  
2  
3 computations were based on a log rank test at the 5% significance level and assumed an annual  
4 rate of 4.7% of CDR progression for individuals with slow changes in disability over time.  
5  
6

## 7 8 9 **Secondary Aim**

10  
11 We also tested non-zero path coefficients that link the latent constructs of network  
12 dysfunction with attentional compared to perceptual/motor systems, and to impaired functional  
13 mobility and falls. The proposed sample provides at least 80% statistical power to detect each  
14 path coefficient.  
15  
16  
17  
18  
19

## 20 21 22 **Participants and public involvement**

23  
24 Participants and the public were not involved in the design, conduct, reporting, or  
25 dissemination plans of our research.  
26  
27  
28  
29

## 30 31 32 **Ethics and dissemination**

33  
34 This study was approved by the Washington University in St. Louis Institutional Review  
35 Board (reference number 201807135). Written, informed consent will be obtained in the home  
36 prior to the collection of any study data. Participants may withdraw from the study at any time.  
37  
38 Results will be published in peer-reviewed publications and presented at national and  
39 international conferences.  
40  
41  
42  
43  
44

## 45 46 47 **DISCUSSION**

48  
49 Changes in functional mobility and an increase in falls may be an early indicator of  
50 preclinical AD.[3, 16, 76] Underlying deviations in functional connectivity may assist in  
51 identifying brain RSNs that are affected and lead to falls.[17] Measures of everyday function  
52 are not currently included in the evaluation of CN individuals with preclinical AD. To  
53  
54  
55  
56  
57  
58  
59  
60

1  
2  
3 examine these relationships, this study will assess the number and severity of falls, functional  
4 mobility (gait and balance), and changes in functional connections (rs-fc) within and across  
5 RSNs in a sample of community-dwelling older adults. This will allow us to characterise  
6 when changes in falls and functional mobility occur during the preclinical stages of AD as  
7 well as potential mechanisms.  
8  
9

10  
11  
12  
13  
14  
15 The strengths of this study include access to a large, well-characterised cohort of  
16 community-dwelling older adults at the Knight ADRC who are enthusiastic about  
17 participating in studies. Another strength includes a comprehensive in-home evaluation of a  
18 participant's fall risks and functional mobility and the ability to share results with each  
19 participant.  
20  
21  
22  
23  
24  
25

26 Although the strengths are promising, there are a few limitations to this study. First,  
27 older adults may not be compliant with fall monitoring over time. The OTs will call  
28 participants to obtain fall information if participants do not want to complete the fall  
29 monitoring via automated call or e-mail. Last, it may be difficult to differentiate falling from  
30 aging-related phenotypes such as frailty. We will collect information on covariates, including  
31 comorbid conditions and other fall risk factors, test these relationships in individuals without  
32 preclinical AD, and control for these covariates in statistical analyses.  
33  
34  
35  
36  
37  
38  
39  
40  
41

42 This study is designed to examine the relationship between falls and functional  
43 mobility and underlying attentional compared to perceptual/motor systems in preclinical  
44 stages of AD. The findings will enhance our understanding of the systemic manifestations of  
45 AD and may identify falls as a previously unknown risk factor for developing preclinical AD.  
46 If successful, this study can potentially inform the timing of interventions in secondary  
47 prevention trials in AD as well as the development of more precise, effective treatments for  
48 individuals at risk for progression to symptomatic AD.[18]  
49  
50  
51  
52  
53  
54  
55  
56  
57  
58  
59  
60

## Acknowledgements

We would like to thank the Knight Alzheimer Disease Research Center staff and all of our participants for making this study possible.

## Author Contributions

The study concept and design was conceived by SLS, BMA, CX, DB, and JM. Patient safety protocols and IRB compliance will be managed by EW, RT, and RB. Recruitment and data collection will be conducted by RMB, RT, and AK. Analysis will be performed by AMF, TB, SES, and CX. The first draft of the protocol was prepared by BMA and SLS. All authors provided edits and approved the final version of the protocol.

## Funding

This work was supported by the National Institute on Aging (1 R01 AG057680-01A1), the Healthy Aging and Senile Dementia Program Project (P01 AG03991), the Knight Alzheimer Disease Research Center (P30 AG066444), Antecedent Biomarkers for AD: the Adult Children Study (P01 AG026276), the Paula C. and Rodger O. Riney Fund, and the Daniel J. Brennan MD Fund.

**Role of the Funder/Sponsor:** The funders had no role in the design or conduct of the study; collection, management, analysis, or interpretation of the data; preparation, review, or approval of the manuscript; or decision to submit the manuscript for publication.

## Competing interests

There are no competing interests for any author.

## REFERENCES

1. World Health Organization. Fact sheets: Dementia: World Health Organization; 2020 [updated September 21, 2020. Available from: <https://www.who.int/en/news-room/fact-sheets/detail/dementia2020>.
2. Patterson C. World Alzheimer Report 2018: the state of the art of dementia research: new frontiers. London: Alzheimer Disease International, 2018.
3. Morris JC, Roe CM, Xiong C, et al. APOE predicts amyloid-beta but not tau Alzheimer pathology in cognitively normal aging. *Ann Neurol* 2010;67(1):122-31. doi: 10.1002/ana.21843
4. Sperling RA, Aisen PS, Beckett LA, et al. Toward defining the preclinical stages of Alzheimer's disease: Recommendations from the National Institute on Aging-Alzheimer's Association workgroups on diagnostic guidelines for Alzheimer's disease. *Alzheimers Dement* 2011;7(3):280-92.
5. Bateman RJ, Xiong CJ, Benzinger TLS, et al. Clinical and biomarker changes in dominantly inherited Alzheimer's Disease. *New Engl J Med* 2012;367(9):795-804. doi: 10.1056/NEJMoal202753
6. Vos SJB, Xiong CJ, Visser PJ, et al. Preclinical Alzheimer's disease and its outcome: a longitudinal cohort study. *Lancet Neurol* 2013;12(10):957-65. doi: 10.1016/S1474-4422(13)70194-7
7. Jack CR, Jr, Bennett DA, Blennow K, et al. A/T/N: an unbiased descriptive classification scheme for Alzheimer disease biomarkers. *Neurology* 2016;87(5):539-47. doi: 10.1212/WNL.0000000000002923
8. Eggenberger P, Wolf M, Schumann M, et al. Exergame and balance training modulate prefrontal brain activity during walking and enhance executive function in older adults. *Front Aging Neurosci* 2016;8:66. doi: 10.3389/fnagi.2016.00066
9. Stark SL, Roe CM, Grant EA, et al. Preclinical Alzheimer disease and risk of falls. *Neurology* 2013;81(5):437-43. Published online first: 2013/06/28. doi: 10.1212/WNL.0b013e31829d8599
10. Montero-Odasso M, Oteng-Amoako A, Speechley M, et al. The motor signature of mild cognitive impairment: results from the gait and brain study. *J Gerontol A Biol Sci Med Sci* 2014 doi: doi:10.1093/gerona/glu155
11. Albers MW, Gilmore GC, Kaye J, et al. At the interface of sensory and motor dysfunctions and Alzheimer's disease. *Alzheimers Dement* 2015;11(1):70-98. doi: 10.1016/j.jalz.2014.04.514
12. Sheridan PL, Hausdorff JM. The role of higher-level cognitive function in gait: executive dysfunction contributes to fall risk in Alzheimer's disease. *Dement Geriatr Cogn Disord* 2007;24(2):125-37.
13. Tinetti ME, Speechley M, Ginter SF. Risk factors for falls among elderly persons living in the community. *New Engl J Med* 1988;319(26):1701-7.
14. Tinetti ME, Williams C. Falls, injuries due to falls, and the risk of admission to a nursing home. *New Engl J Med* 1997;337(18):1279-84.
15. Morris JC, Rubin EH, Morris EJ, et al. Senile dementia of the Alzheimer's type: an important risk factor for serious falls. *J Gerontol* 1987;42(4):412-17.
16. McGough EL, Lin SY, Belza B, et al. A scoping review of physical performance outcome measures used in exercise interventions for older adults with alzheimer disease and



- related dementias. *J Geriatr Phys Ther* 2019;42(1):28-47. Published online first: 2017/12/07. doi: 10.1519/JPT.000000000000159
17. Brier MR, Thomas JB, Snyder AZ, et al. Loss of intranetwork and internetwork resting state functional connections with Alzheimer's disease progression. *J Neurosci* 2012;32(26):8890-99.
  18. Ansai JH, Andrade LP, Masse FAA, et al. Risk factors for falls in older adults with mild cognitive impairment and mild alzheimer disease. *J Geriatr Phys Ther* 2019;42(3):E116-E21. Published online first: 2017/08/09. doi: 10.1519/JPT.000000000000135
  19. Morris JC. The Clinical Dementia rating (CDR): Current version and scoring rules *Neurology* 1993;43(11):2412-14.
  20. Morris JC, Schindler SE, McCue LM, et al. Assessment of racial disparities in biomarkers for Alzheimer disease. *JAMA Neurol* 2019;76(3):264-73. Published online first: 2019/01/08. doi: 10.1001/jamaneurol.2018.4249
  21. Berg L, McKeel DW, Jr., Miller JP, et al. Neuropathological indexes of Alzheimer's disease in demented and nondemented persons aged 80 years and older. *Arch Neurol* 1993;50(4):349-58.
  22. Storandt M, Hill RD. Very mild senile dementia of the Alzheimer type. II. Psychometric test performance. *Arch Neurol* 1989;46(4):383-6.
  23. Duchek JM, Balota DA, Thomas JB, et al. Relationship between Stroop performance and resting state functional connectivity in cognitively normal older adults. *Neuropsychology* 2013;27(5):516.
  24. Aschenbrenner AJ, Balota DA, Fagan AM, et al. Alzheimer disease cerebrospinal fluid biomarkers moderate baseline differences and predict longitudinal change in attentional control and episodic memory composites in the adult children study. *J Int Neuropsychol Soc* 2015;21(8):573-83.
  25. Aschenbrenner AJ, Balota DA, Tse C-S, et al. Alzheimer disease biomarkers, attentional control, and semantic memory retrieval: synergistic and mediational effects of biomarkers on a sensitive cognitive measure in non-demented older adults. *Neuropsychology* 2015;29(3):368.
  26. Su Y, D'Angelo GM, Vlassenko AG, et al. Quantitative analysis of PiB-PET with FreeSurfer ROIs. *PloS One* 2013;8(11):e73377.
  27. Joshi AD, Pontecorvo MJ, Clark CM, et al. Performance characteristics of amyloid PET with florbetapir F 18 in patients with Alzheimer's disease and cognitively normal subjects. *J Nucl Med* 2012;53(3):378-84. doi: 10.2967/jnumed.111.090340
  28. Wang L, Benzinger T, Hassenstab J. Spatially distinct atrophy is linked to  $\beta$ -amyloid and tau in preclinical alzheimer disease. *Neurology* 2015;84:1254-60.
  29. Carrillo MC, Blackwell A, Hampel H, et al. Early risk assessment for Alzheimer's disease. *Alzheimers Dement* 2009;5:182-96.
  30. Craig-Schapiro R, Fagan AM, Holtzman DM. Biomarkers of Alzheimer's disease. *Neurobiol Dis* 2009;35:128-40.
  31. Fischl B, Salat DH, Busa E, et al. Whole brain segmentation: automated labeling of neuroanatomical structures in the human brain. *Neuron* 2002;33(3):341-55. Published online first: 2002/02/08. doi: 10.1016/s0896-6273(02)00569-x
  32. Shulman GL, Pope DL, Astafiev SV, et al. Right hemisphere dominance during spatial selective attention and target detection occurs outside the dorsal frontoparietal network. *J Neurosci* 2010;30(10):3640-51. Published online first: 2010/03/12. doi: 10.1523/JNEUROSCI.4085-09.2010

- 1  
2  
3 33. Fagan AM, Mintun MA, Mach RH, et al. Inverse relation between in vivo amyloid imaging  
4 load and cerebrospinal fluid Abeta42 in humans. *Ann Neurol* 2006;59(3):512-9.  
5 Published online first: 2005/12/24. doi: 10.1002/ana.20730  
6  
7 34. Kaplow J, Vandijck M, Gray J, et al. Concordance of Lumipulse cerebrospinal fluid t-  
8 tau/Abeta42 ratio with amyloid PET status. *Alzheimers Dement* 2020;16(1):144-52.  
9 Published online first: 2020/01/09. doi: 10.1002/alz.12000  
10  
11 35. Cruchaga C, Kauwe JS, Mayo K, et al. SNPs associated with cerebrospinal fluid phospho-tau  
12 levels influence rate of decline in Alzheimer's disease. *PLoS Genet* 2010;6(9):e1001101.  
13 Published online first: 2010/09/24. doi: 10.1371/journal.pgen.1001101  
14  
15 36. Soldan A, Pettigrew C, Fagan AM, et al. ATN profiles among cognitively normal individuals  
16 and longitudinal cognitive outcomes. *Neurology* 2019;92(14):e1567-e79. Published  
17 online first: 2019/03/08. doi: 10.1212/WNL.00000000000007248  
18  
19 37. Mishra S, Gordon BA, Su Y, et al. AV-1451 PET imaging of tau pathology in preclinical  
20 Alzheimer disease: defining a summary measure. *Neuroimage* 2017;161:171-78. doi:  
21 10.1016/j.neuroimage.2017.07.050  
22  
23 38. Lusardi MM, Fritz S, Middleton A, et al. Determining risk of falls in community dwelling  
24 older adults: A systematic review and meta-analysis using posttest probability. *J Geriatr*  
25 *Phys Ther (2001)* 2017;40(1):1-36. doi: 10.1519/JPT.0000000000000099  
26  
27 39. MacLeod CM. The Stroop task: The "gold standard" of attentional measures. *J Exp Psychol*  
28 *Gen* 1992;121(1):12-14.  
29  
30 40. Simon JR. Reactions toward the source of stimulation. *J Exp Psychol* 1969;81(1):174-76.  
31 doi: 10.1037/h0027448  
32  
33 41. Schmitter-Edgecombe M, Langill M. Costs of a predictable switch between simple cognitive  
34 tasks following severe closed-head injury. *Neuropsychology* 2006;20(6):675-84. doi:  
35 10.1037/0894-4105.20.6.675  
36  
37 42. O'Connor SM, Baweja HS, Goble DJ. Validating the BTrackS Balance Plate as a low cost  
38 alternative for the measurement of sway-induced center of pressure. *J Appl Biomech*  
39 2016;49(16):4142-45. Published online first: 2016/10/30. doi:  
40 10.1016/j.jbiomech.2016.10.020  
41  
42 43. Rikli RE, Jones CJ. Functional fitness normative scores for community-residing older adults,  
43 ages 60-94. *J Aging and Phys Act* 1999;7(2):162-81.  
44  
45 44. O'Shea SD, Taylor NF, Paratz JD. Measuring muscle strength for people with chronic  
46 obstructive pulmonary disease: retest reliability of hand-held dynamometry. *Arch Phys*  
47 *Med Rehabil* 2007;88(1):32-6. doi: 10.1016/j.apmr.2006.10.002  
48  
49 45. Bohannon RW. Hand-grip dynamometry predicts future outcomes in aging adults. *J Geriatr*  
50 *Phys Ther* 2008;31(1):3-10. Published online first: 2008/05/21. doi: 10.1519/00139143-  
51 200831010-00002  
52  
53 46. Ferris FL, Kassoff A, Bresnick G, et al. New visual acuity charts for clinical research. *Am J*  
54 *Ophthalmol* 1982;94:91-96.  
55  
56 47. Pelli DG, Robson JG, Wilkins AJ. The design of a new letter chart for measuring contrast  
57 sensitivity. *Clin Vis Sci* 1988;2(3):187-99.  
58  
59 48. Kastenbauer T, Sauseng S, Brath H, et al. The value of the Rydel-Seiffer tuning fork as a  
60 predictor of diabetic polyneuropathy compared with a neurothesiometer. *Diabet Med*  
2004;21(6):563-7. doi: 10.1111/j.1464-5491.2004.01205.x  
49. Tinetti ME. Performance-oriented assessment of mobility problems in elderly patients. *J Am Geriatr Soc* 1986;34(2):119-26.

- 1
- 2
- 3
- 4 50. Podsiadlo D, Richardson S. The timed "Up & Go": a test of basic functional mobility for frail
- 5 elderly persons. *J Am Geriatr Soc* 1991;39(2):142-48.
- 6 51. Shumway-Cook A, Brauer S, Woollacott M. Predicting the probability for falls in
- 7 community-dwelling older adults using the Timed Up & Go Test. *Phys Ther*
- 8 2000;80(9):896.
- 9 52. Lundin-Olsson L, Nyberg L, Gustafson Y. Attention, frailty, and falls: the effect of a manual
- 10 task on basic mobility. *J Am Geriatr Soc* 1998;46(6):758-61. Published online first:
- 11 1998/06/13. doi: 10.1111/j.1532-5415.1998.tb03813.x
- 12 53. Blow FC, Brower KJ, Schulenberg JE, et al. The Michigan Alcoholism Screening Test –
- 13 Geriatric Version (MAST-G): a new elderly-specific screening instrument. *Alcohol Clin*
- 14 *Exp Res* 1992;16:372.
- 15 54. Spitzer RL, Kroenke K, Williams JB. Validation and utility of a self-report version of
- 16 PRIME-MD: the PHQ primary care study. Primary Care Evaluation of Mental Disorders.
- 17 Patient Health Questionnaire. *JAMA* 1999;282(18):1737-44. Published online first:
- 18 1999/11/24. doi: 10.1001/jama.282.18.1737
- 19 55. Sheikh J, Yesavage J. Geriatric Depression Scale (GDS): Recent evidence and development
- 20 of a shorter version. *Clin Gerontol* 1986;5:165-73.
- 21 56. Brown JS, Vittinghoff E, Wyman JF, et al. Urinary incontinence: does it increase risk for
- 22 falls and fractures? *J Am Geriatr Soc* 200;48(7):721-25. doi: 10.1111/j.1532-
- 23 5415.2000.tb04744.
- 24 57. Gandek B, Ware JE, Aaronson NK, et al. Cross-validation of item selection and scoring for
- 25 the SF-12 Health Survey in nine countries: results from the IQOLA Project. International
- 26 Quality of Life Assessment. *J Clin Epidemiol* 1998;51(11):1171-8.
- 27 58. Fillenbaum GG, Smyer MA. The development, validity, and reliability of the OARS
- 28 multidimensional functional assessment questionnaire. *J Gerontol* 1981;36(4):428-34.
- 29 Published online first: 1981/07/01. doi: 10.1093/geronj/36.4.428
- 30 59. Rogers J, Holm M. Performance Assessment of Self-care Skills. Unpublished performance
- 31 test. Pittsburgh, PA: University of Pittsburgh, 1989.
- 32 60. Clemson L, Cumming RG, Heard R. The development of an assessment to evaluate
- 33 behavioral factors associated with falling. *Am J Occup Ther* 2003;57(4):380-8. Published
- 34 online first: 2003/08/13. doi: 10.5014/ajot.57.4.380
- 35 61. Kempen GI, Yardley L, Van Haastregt JC, et al. The Short FES-I: a shortened version of the
- 36 falls efficacy scale-international to assess fear of falling. *Age Ageing* 2008;37(1):45-50.
- 37 62. Clemson L, Roland M, Cumming RG. Types of hazards in the homes of elderly people.
- 38 *Occup Ther J Res* 1997;17(3):200-13.
- 39 63. Doty RL, Shaman P, Kimmelman CP, et al. University of Pennsylvania Smell Identification
- 40 Test: a rapid quantitative olfactory function test for the clinic. *Laryngoscope* 1984;94(2
- 41 Pt 1):176-8. Published online first: 1984/02/01. doi: 10.1288/00005537-198402000-
- 42 00004
- 43 64. Ventry IM, Weinstein BE. Identification of elderly people with hearing problems. *ASHA*
- 44 1983;25(7):37-42. Published online first: 1983/07/01.
- 45 65. Lamb SE, Jørstad-Stein EC, Hauer K, et al. Development of a common outcome data set for
- 46 fall injury prevention trials: The prevention of falls network Europe consensus. *J Am*
- 47 *Geriatr Soc* 2005;53(9):1618-22.
- 48 66. Lach H, Reed A, Arfken C, et al. Falls in the elderly: reliability of a classification system.
- 49 *Am Geriatr Soc* 1991;39(2):197-202.
- 50
- 51
- 52
- 53
- 54
- 55
- 56
- 57
- 58
- 59
- 60

- 1  
2  
3 67. Stark SL, Silianoff TJ, Kim HL, et al. Tailored calendar journals to ascertain falls among  
4 older adults. *OTJR* 2015;35(1):53-59.  
5  
6 68. Stark S, Somerville E, Keglovits M, et al. Feasibility trial of tailored home modifications:  
7 process outcomes. *Am J Occup Ther* 2018;72(1):7201205020p1–20p10. doi:  
8 10.5014/ajot.2018.021774  
9  
10 69. Harris PA, Taylor R, Thielke R, et al. Research electronic data capture (REDCap)--a  
11 metadata-driven methodology and workflow process for providing translational research  
12 informatics support. *J Biomed Informa* 2009;42(2):377-81. Published online first:  
13 2008/10/22. doi: 10.1016/j.jbi.2008.08.010  
14  
15 70. Milliken GA, Johnson DE, editors. *Analysis of Messy Data*. New York: Chapman &  
16 Hall/CRC 2001.  
17  
18 71. Benjamini Y, Hochberg Y. Controlling the false discovery rate: A practical and powerful  
19 approach to multiple testing. *J R Stat Soc Series B Methodol* 1995;57(1):289-300.  
20  
21 72. Diggle P, Liang K-Y, Zeger SL. *Analysis of Longitudinal Data*. New York: Oxford  
22 University Press 1994.  
23  
24 73. Jacqmin-Gadda H, Commenges D, Dartigues JF. Random changepoint model for joint  
25 modeling of cognitive decline and dementia. *Biometrics* 2006;62(1):254-60.  
26  
27 74. De Gruttola V, Tu XM. Modelling progression of CD4-lymphocyte count and its relationship  
28 to survival time. *Biometrics* 1994:1003-14.  
29  
30 75. Kline RB. *Principles and Practice of Structural Equation Modeling*. Fourth ed. New York:  
31 The Guilford Press 2015.  
32  
33 76. Stark SL, Roe C, Grant E, et al. Risk of falls in older adults with preclinical Alzheimer's  
34 disease. Alzheimer's Association International Conference on Alzheimer's Disease Paris,  
35 France, 2011.  
36  
37  
38  
39  
40  
41  
42  
43  
44  
45  
46  
47  
48  
49  
50  
51  
52  
53  
54  
55  
56  
57  
58  
59  
60

## Figure Titles and Legends

**Figure 1. Research design overview.** Measures of interest collected by the Knight ADRC will be available at no cost. In-home assessments will be collected annually, and falls will be monitored prospectively.

1  
2  
3  
4  
5  
6  
7  
8  
9  
10  
11  
12  
13  
14  
15  
16  
17  
18  
19  
20  
21  
22  
23  
24  
25  
26  
27  
28  
29  
30  
31  
32  
33  
34  
35  
36  
37  
38  
39  
40  
41  
42  
43  
44  
45  
46  
47  
48  
49  
50  
51  
52  
53  
54  
55  
56  
57  
58  
59  
60

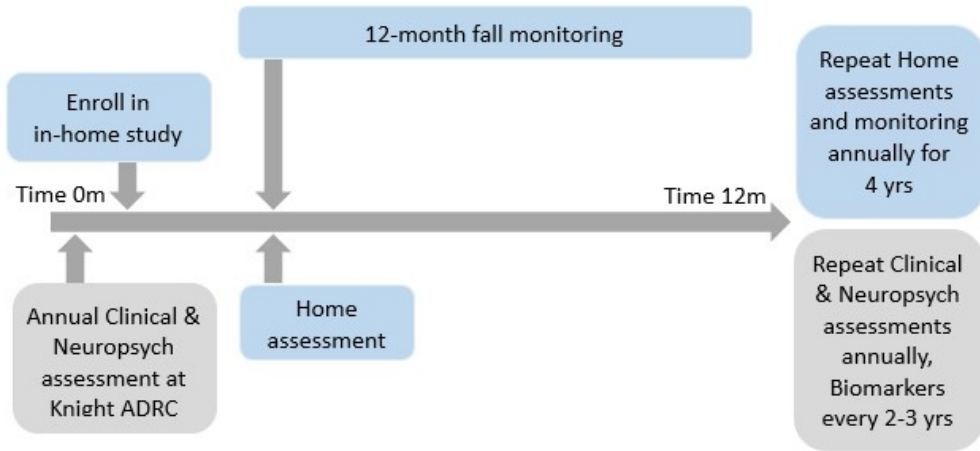

Figure 1. Research design overview. Measures of interest collected by the Knight ADRC will be available at no cost. In-home assessments will be collected annually, and falls will be monitored prospectively.

166x77mm (96 x 96 DPI)
