# Supplementary material for: Falls: a marker of preclinical Alzheimer disease: a cohort study protocol
Source: PubMed Central journal article supplement — BMJ Open. 2021 Sep 15;11(9):e050820. doi: 10.1136/bmjopen-2021-050820 (PMC8444237; doi:10.1136/bmjopen-2021-050820), 2021-09-15
Supplement: bmjopen-2021-050820.reviewer_comments.pdf [file bmjopen-2021-050820.reviewer_comments.pdf]

## PEER REVIEW HISTORY

BMJ Open publishes all reviews undertaken for accepted manuscripts. Reviewers are asked to complete a checklist review form (<http://bmjopen.bmj.com/site/about/resources/checklist.pdf>) and are provided with free text boxes to elaborate on their assessment. These free text comments are reproduced below.

### ARTICLE DETAILS

|                            |                                                                                                                                                                                                           |
|----------------------------|-----------------------------------------------------------------------------------------------------------------------------------------------------------------------------------------------------------|
| <b>TITLE (PROVISIONAL)</b> | Falls: A Marker of Preclinical Alzheimer Disease: A Cohort Study Protocol                                                                                                                                 |
| <b>AUTHORS</b>             | Bollinger, Rebecca; Keleman, Audrey; Thompson, Regina; Westerhaus, Elizabeth; Fagan, Anne; Benzinger, Tammie; Schindler, Suzanne; Xiong, Chengjie; Balota, David; Morris, John; Ances, Beau; Stark, Susan |

### VERSION 1 – REVIEW

|                         |                                                                                    |
|-------------------------|------------------------------------------------------------------------------------|
| <b>REVIEWER</b>         | Fulvio Lauretani<br>Parma University Hospital, Internal Medicine and Subacute Unit |
| <b>REVIEW RETURNED</b>  | 05-May-2021                                                                        |
| <b>GENERAL COMMENTS</b> | Dear Authors<br>the study is well organized and presented                          |
